# Supplementary material for: De novo fabrication of higher arene ring incorporated contorted calix[2]phyrin(2.2.1.1.1) and its F− bound complex
Source: Royal Society of Chemistry journal article supplement (doi:10.1039/d4dt01903b), 2024-01-01
Supplement: d4dt01903b1.pdf [file d4dt01903b1.pdf]

## Electronic Supporting Information

*De novo* Fabrication of Higher Arene Ring Incorporated  
Contorted Calix[2]phyrin(2.2.1.1.1) and Its F<sup>-</sup> Bound Complex

Sourav Ranjan Pradhan,<sup>[a]</sup> Chetan Kumar Prasad,<sup>[a]</sup> Mainak Das<sup>\*[b]</sup> and  
A. Srinivasan<sup>\*[a]</sup>

[a] National Institute of Science Education and Research (NISER), An OCC of  
Homi Bhabha National Institute, Bhubaneswar 752050, Odisha, India.

[b] Department of Chemistry, University of York, Heslington, York, YO10  
5DD, UK

## Table of Content

|                                                             |           |
|-------------------------------------------------------------|-----------|
| 1. Mass Spectral analyses                                   | : S3      |
| 2. NMR Spectral analyses                                    | : S4-S8   |
| 3. Single crystal X-ray analyses of <b>1</b> and <b>1.F</b> | : S9-S14  |
| 4. Electronic absorption spectral analysis                  | : S15-S18 |
| 5. Theoretical Calculations                                 | : S19-S34 |
| 6. References                                               | : S35     |

# 1. Mass spectral analyses:

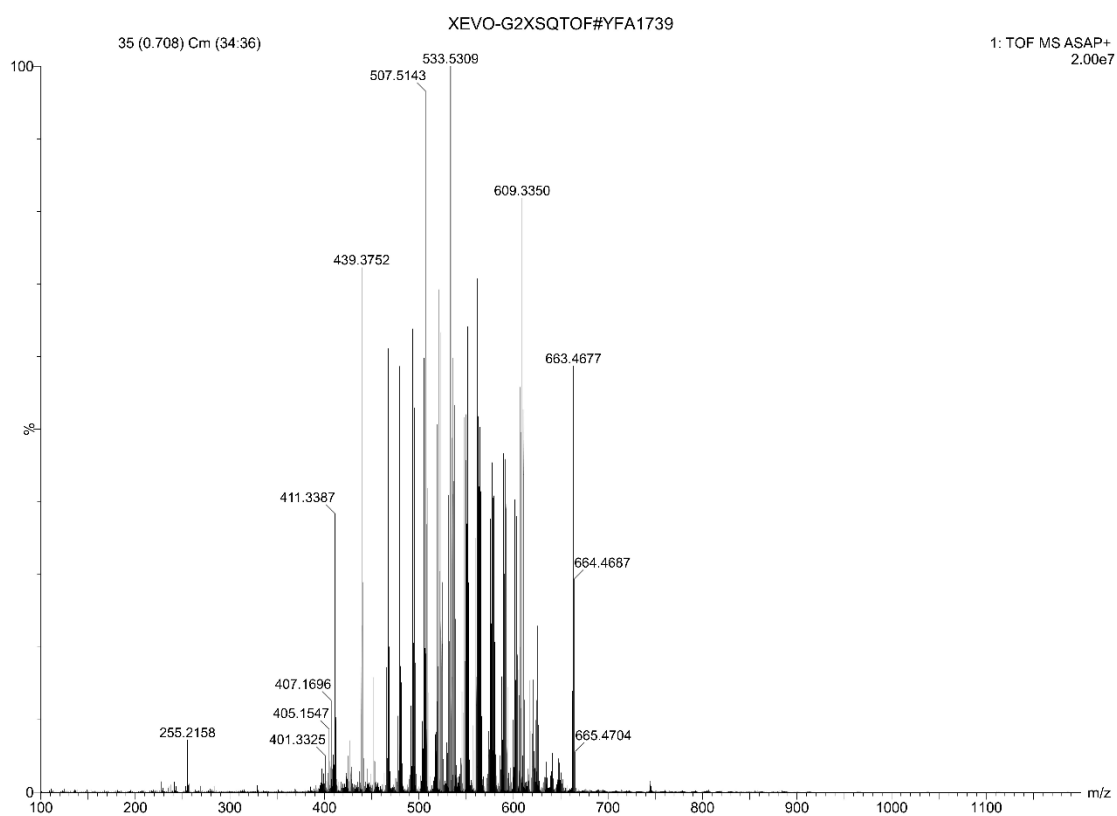

**Fig. S1.** Complete Mass (ESI-MS) spectrum of **1**.

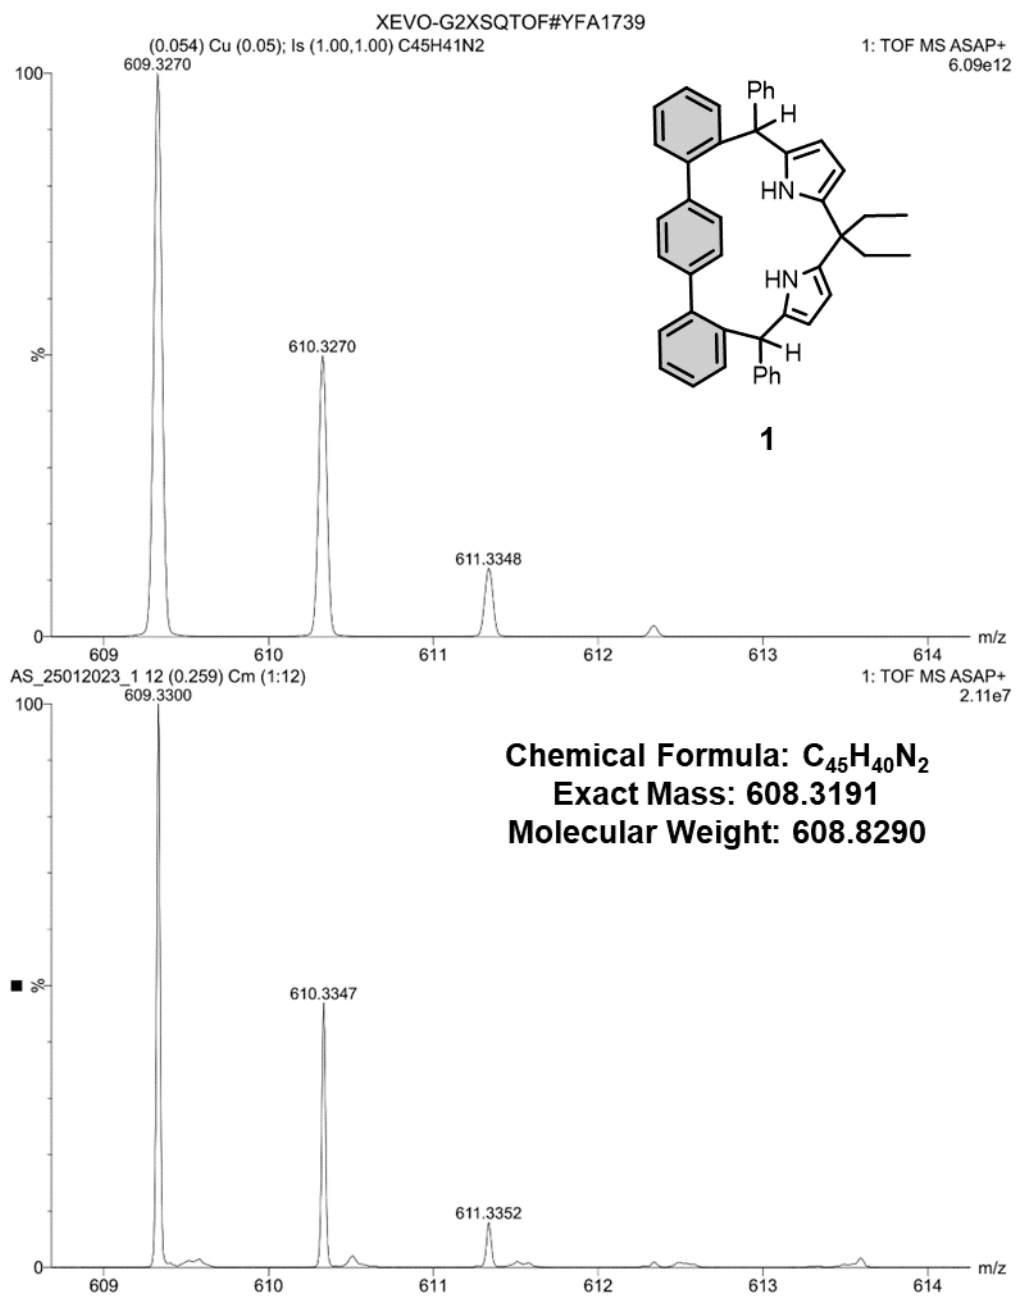

**Fig. S2.** (HR-ESI) Mass spectrum of **1**.

## 2. NMR spectral analyses:

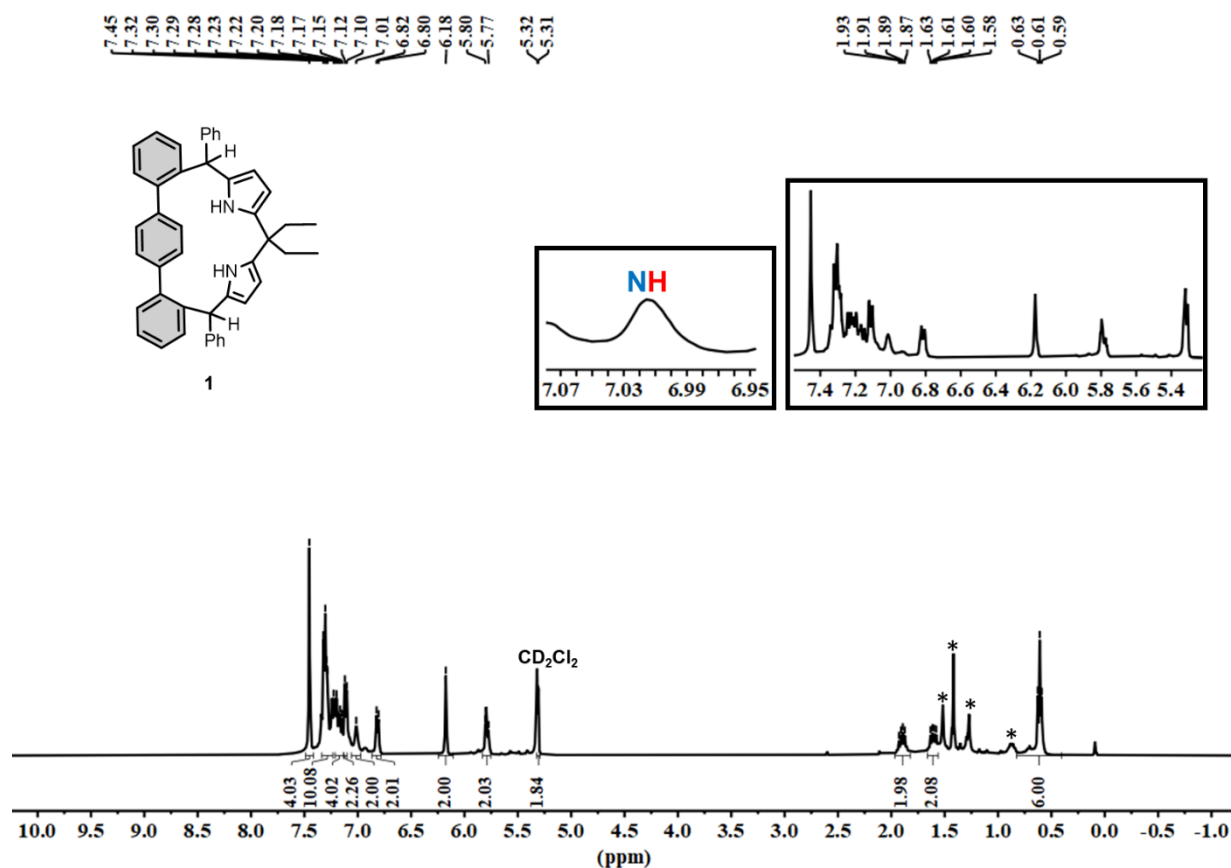

**Fig. S3.**  $^1\text{H}$  (400 MHz) NMR spectrum of **1** in  $\text{CD}_2\text{Cl}_2$  at 298K (\*Residual solvents and impurity grease).

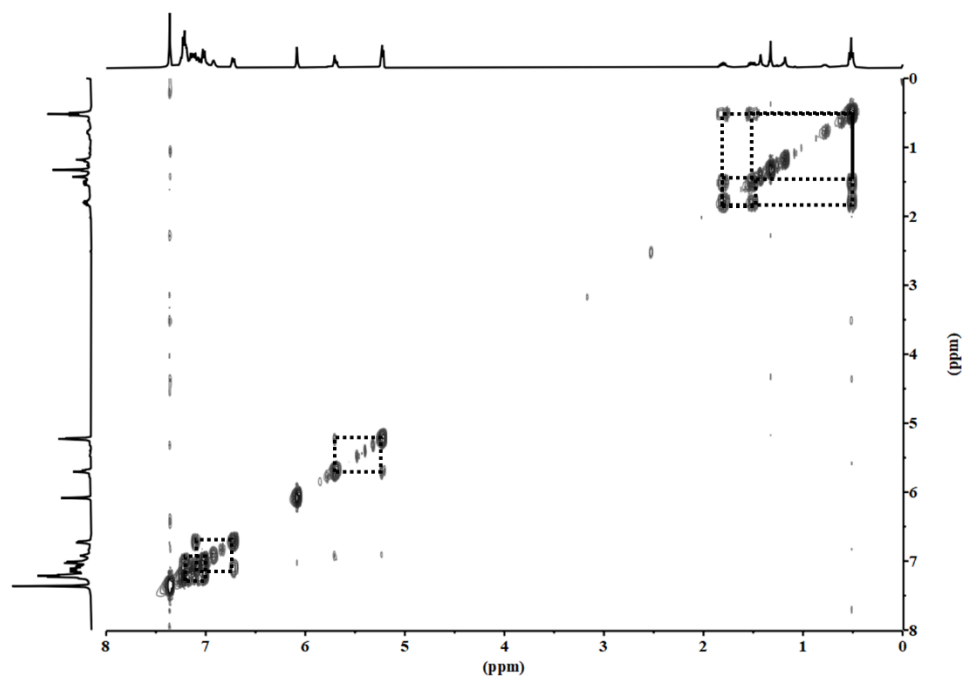

**Fig. S4.**  $^1\text{H}$ - $^1\text{H}$  COSY spectrum of **1** in  $\text{CD}_2\text{Cl}_2$  at 298K.

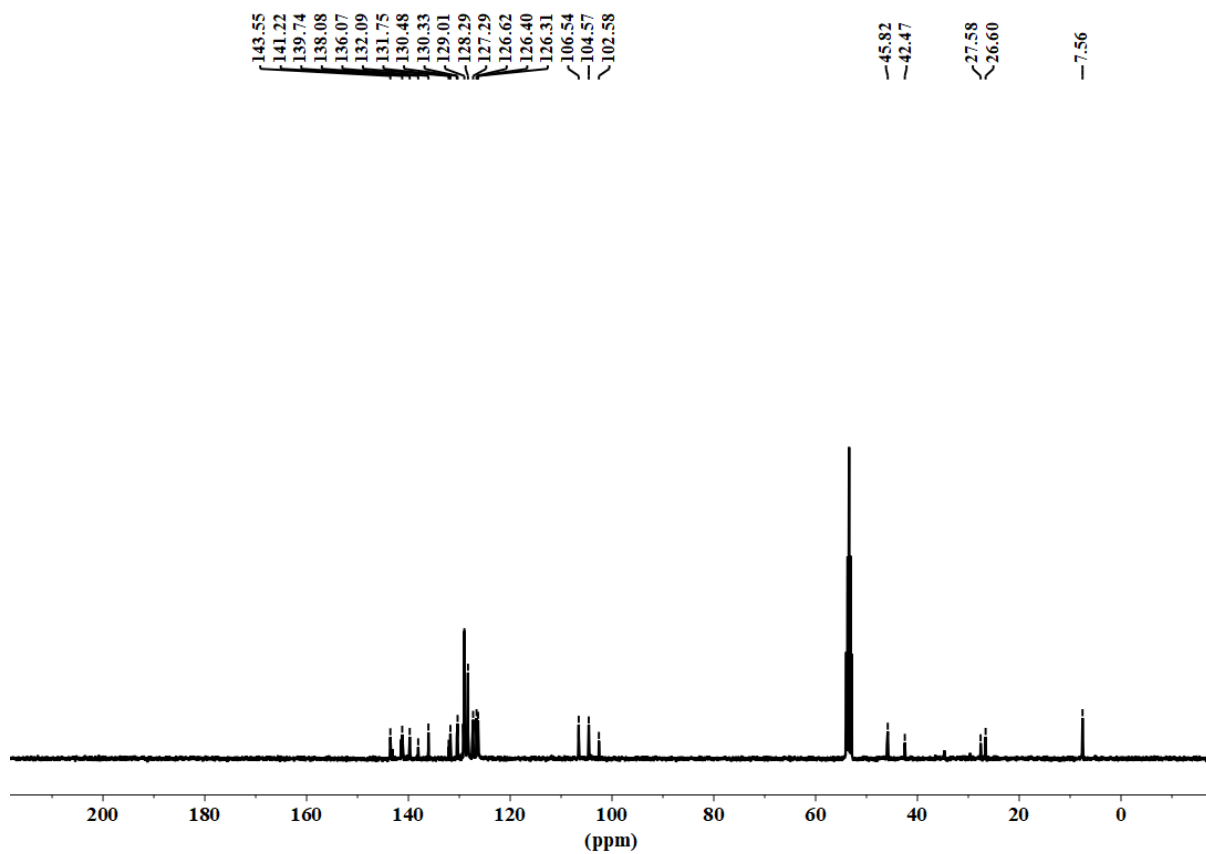

Fig. S5.  $^{13}\text{C}\{^1\text{H}\}$  (101 MHz) NMR spectrum of **1** in  $\text{CD}_2\text{Cl}_2$  at 298K.

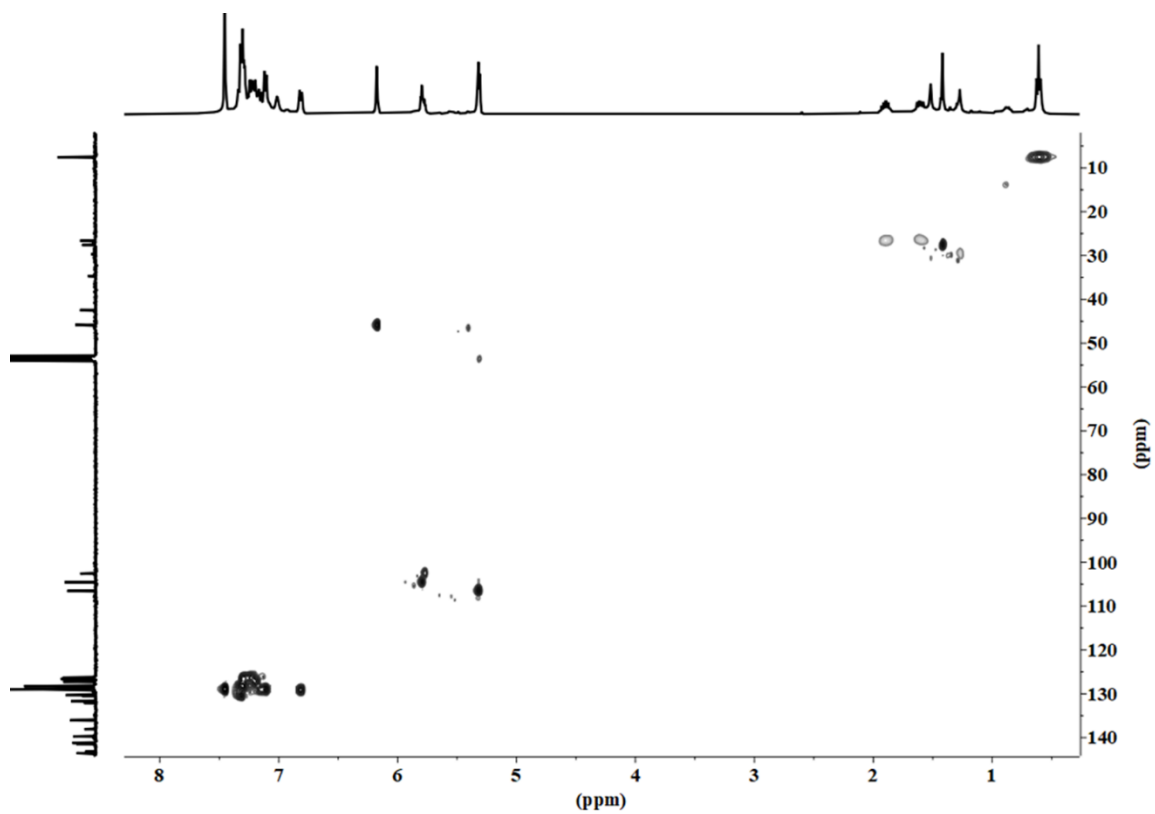

Fig. S6.  $^1\text{H}\text{-}^{13}\text{C}$  HSQC spectrum of **1** in  $\text{CD}_2\text{Cl}_2$  at 298K.

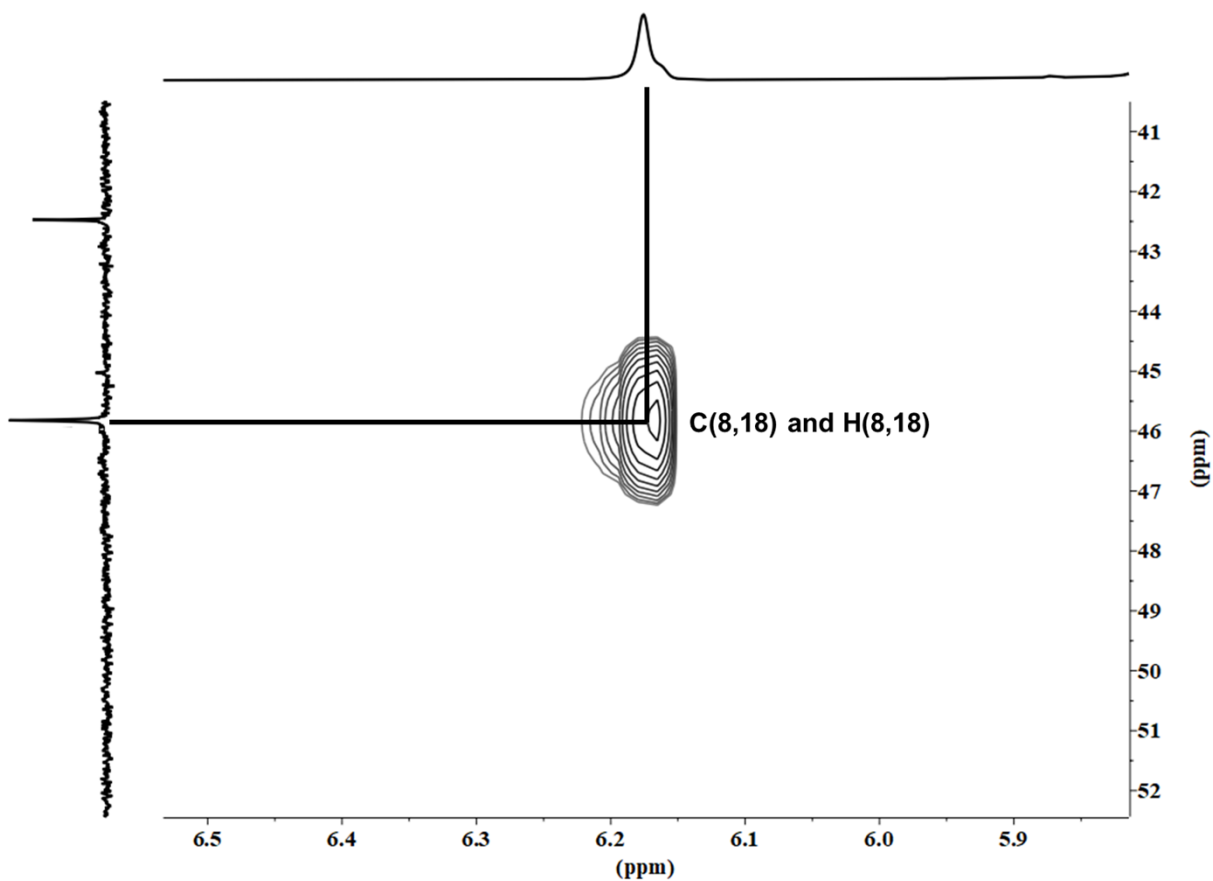

**Fig. S7.**  $^1\text{H}$ - $^{13}\text{C}$  HSQC spectrum of **1** with correlation between C(8,18) and H(8,18) in  $\text{CD}_2\text{Cl}_2$  at 298K.

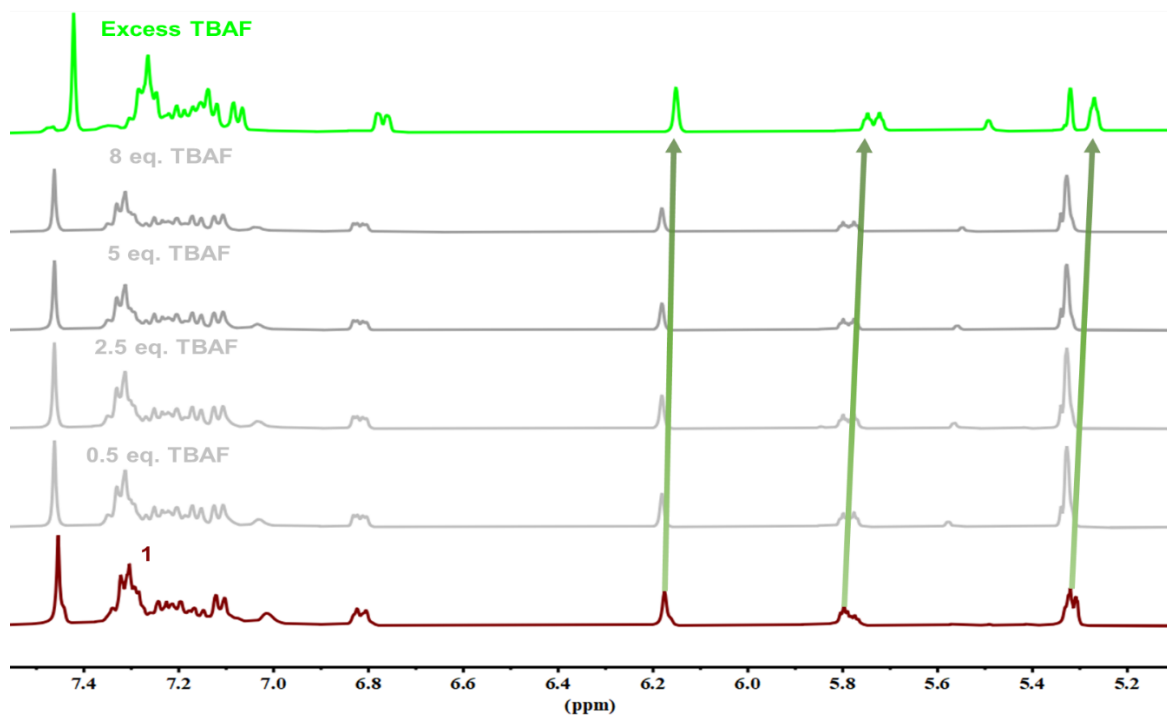

**Fig. S8.**  $^1\text{H}$ -NMR spectra of **1** with increasing concentration of TBAF in  $\text{CD}_2\text{Cl}_2$  at 298 K (5.2-7.5 ppm region).

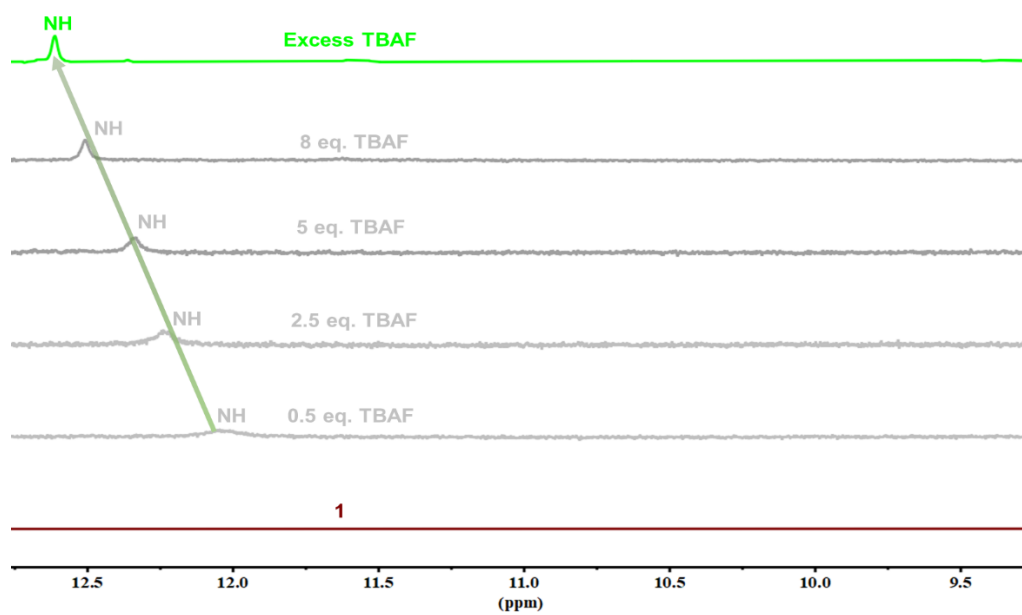

**Fig. S9.** <sup>1</sup>H-NMR spectra of **1** with increasing concentration of TBAF in CD<sub>2</sub>Cl<sub>2</sub> at 298 K (9.5-13 ppm region showing change in the NH peak).

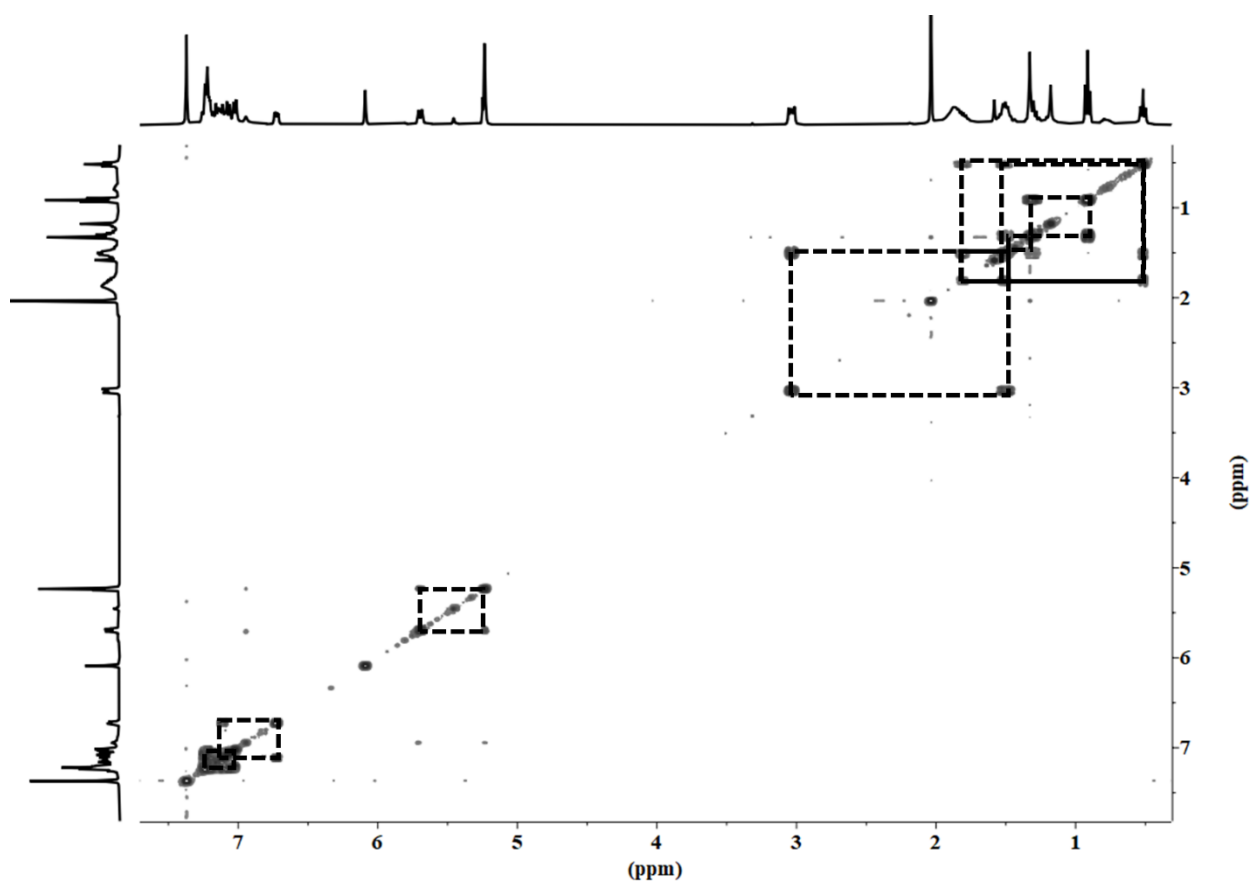

**Fig. S10.** <sup>1</sup>H-<sup>1</sup>H COSY spectrum of **1** after the addition of 8 eq. TBAF in CD<sub>2</sub>Cl<sub>2</sub> at 223K.



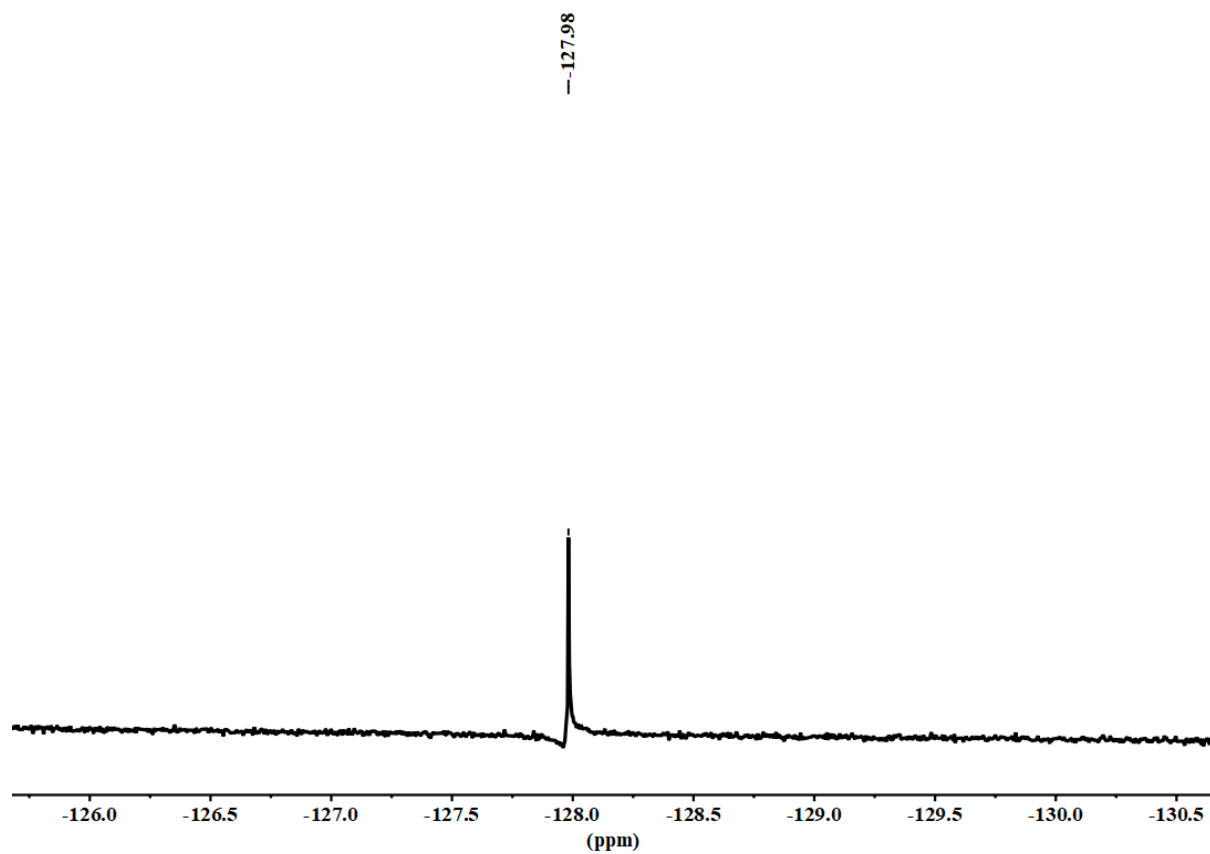

**Fig. S11.**  $^{19}\text{F}$  (376 MHz) NMR spectrum of **1.F** in  $\text{CDCl}_3$  at 298 K.

### 3. Single crystal X-ray analyses of 1 and 1.F:

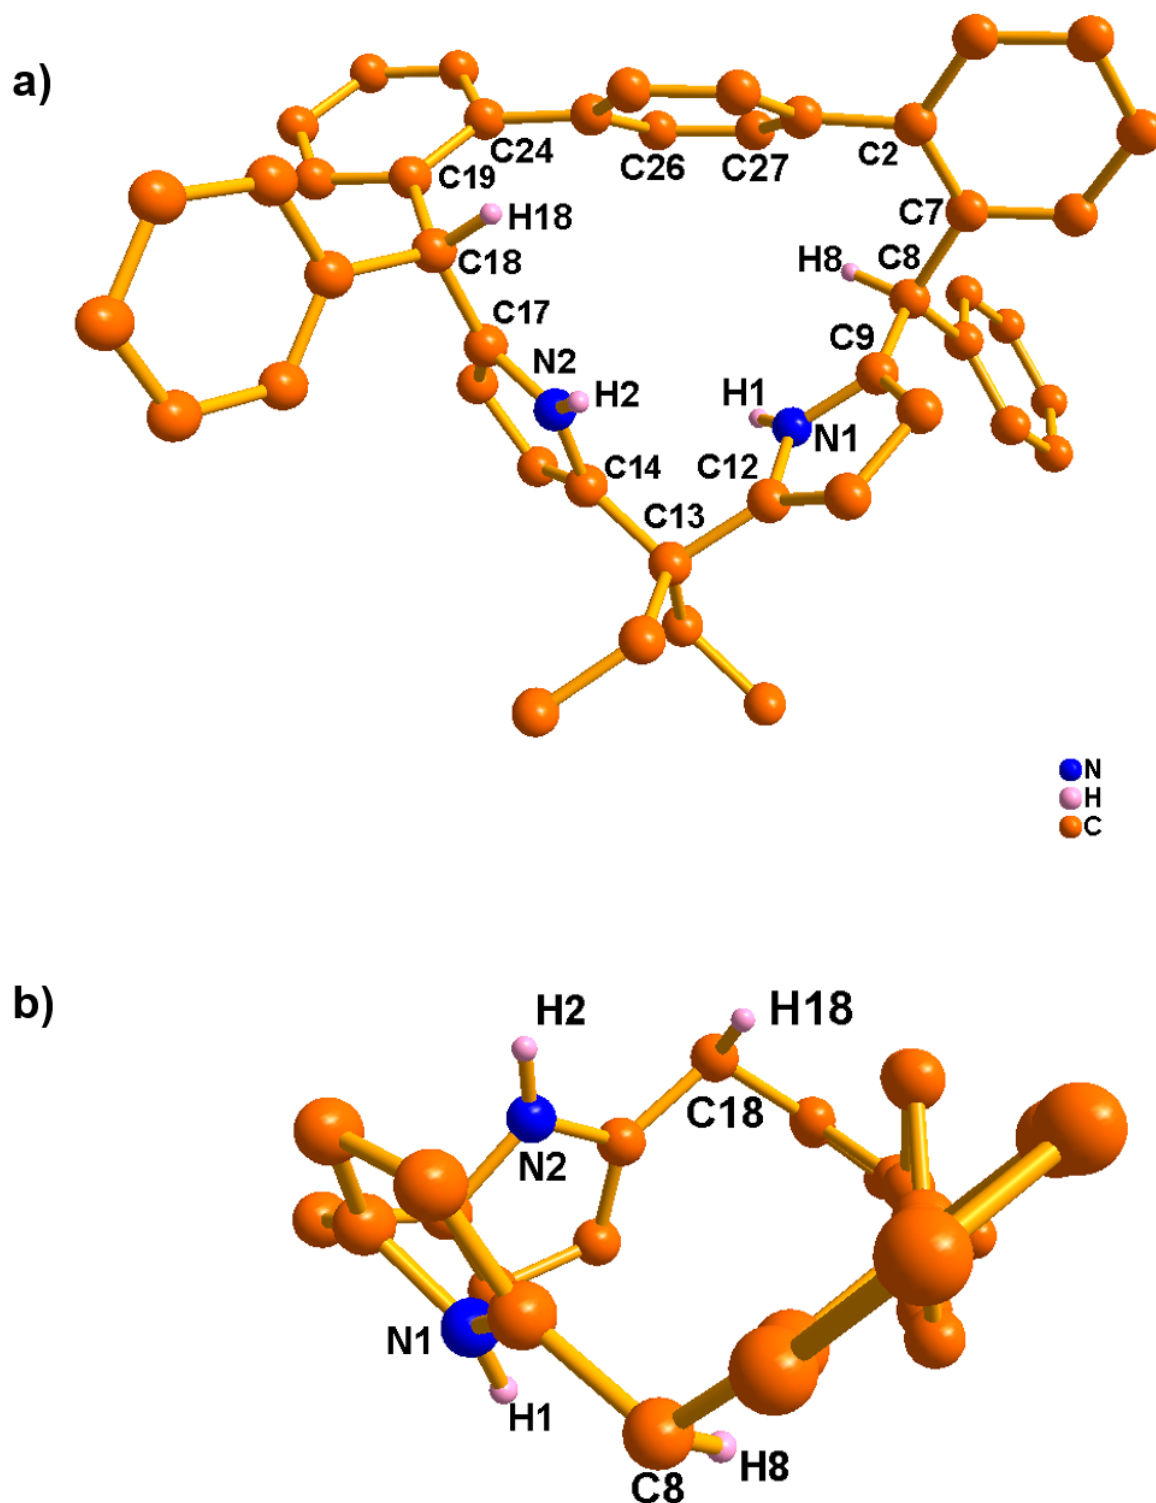

**Fig. S12.** Single crystal X-ray structure of 1. a) Top view and b) Side view. Peripheral hydrogen atoms in a), b) and *meso*-aryl groups in b) are omitted for clarity.

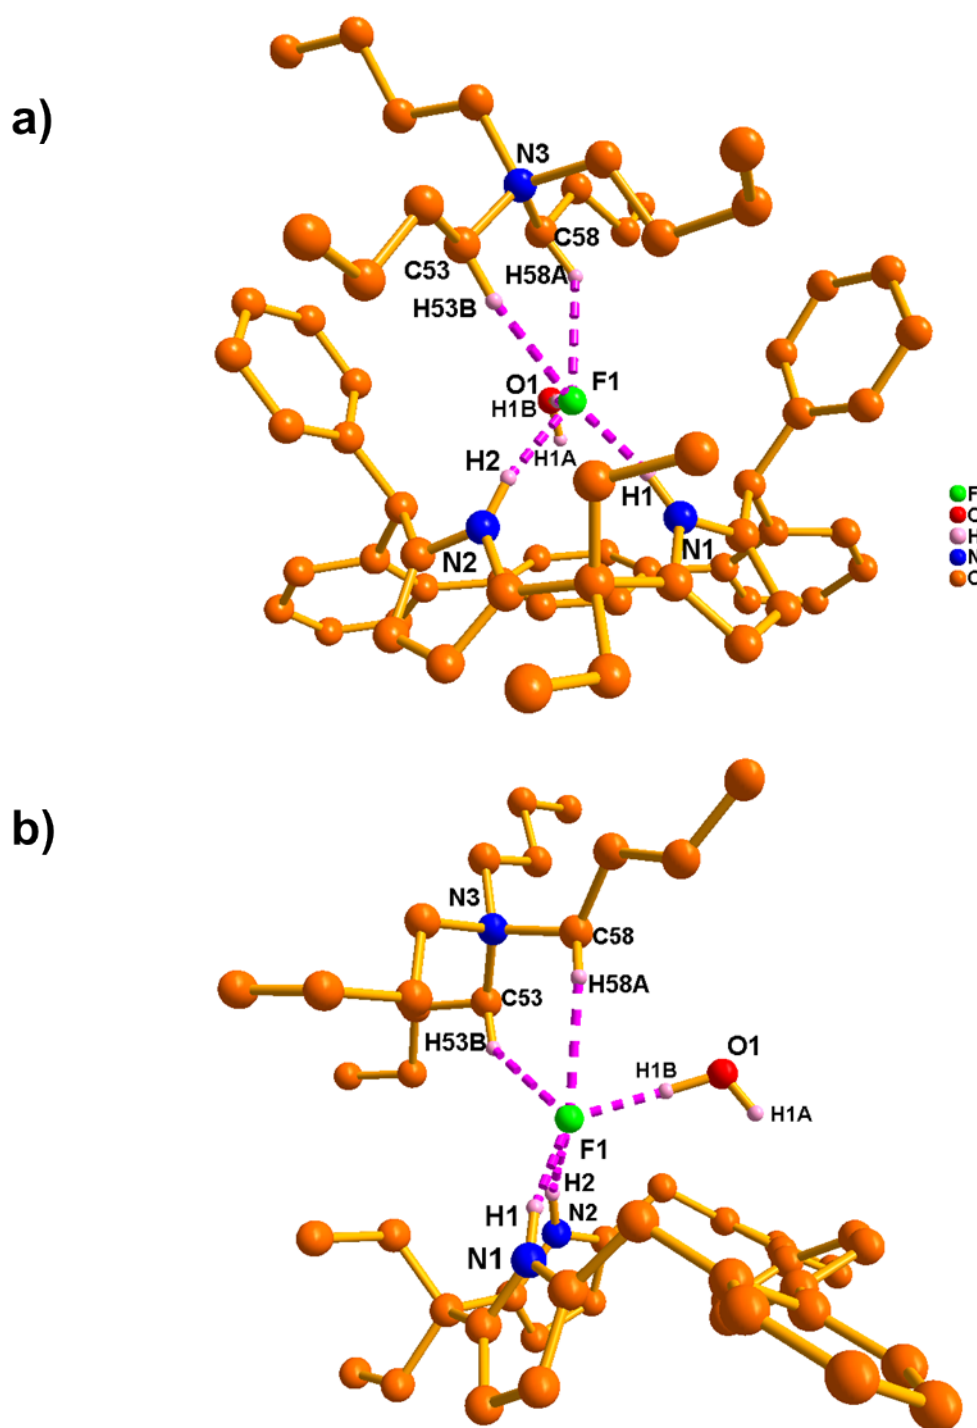

**Fig. S13.** Single crystal X-ray structure of **1.F**. **a)** Top view and **b)** Side view. Peripheral hydrogen atoms and hydrogen atoms not involved in intermolecular hydrogen bond with fluoride anion in a), b) and *meso*-phenyl groups in b) are omitted for clarity.

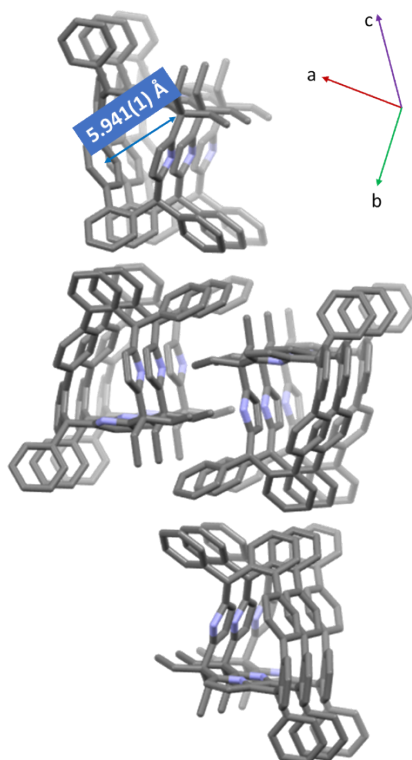

**Fig. S14.** Top view of **1** (peripheral hydrogens are omitted for clarity) with the tubular representation of the solid-state superstructures, displaying the nanometer-sized cavity with a dimension of 5.941(1) Å. The hydrogen atoms are omitted for the sake of clarity.

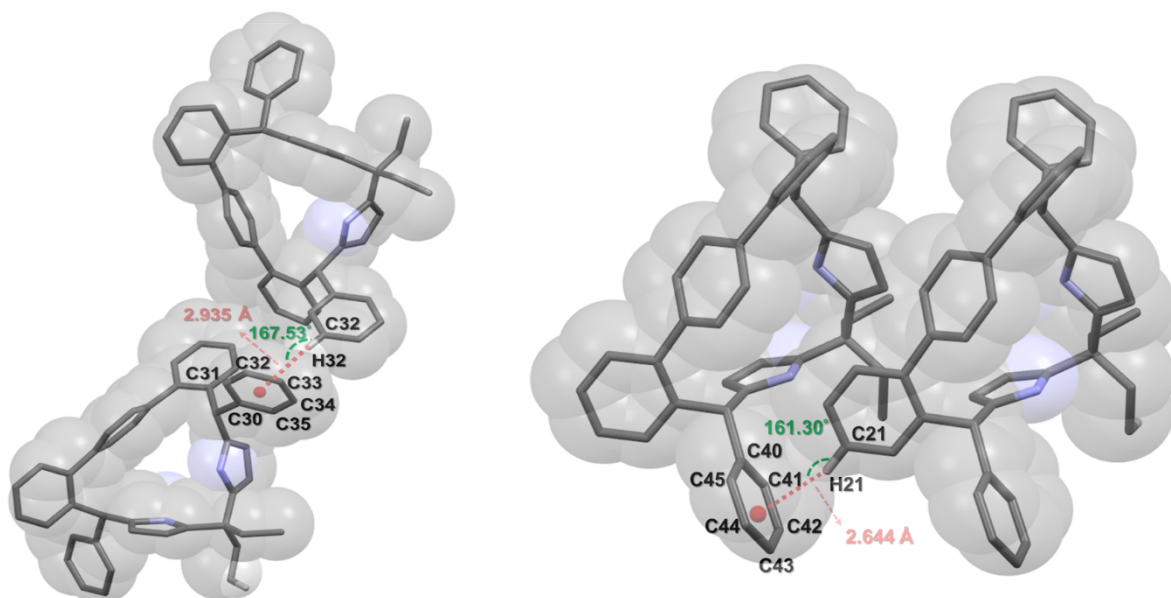

**Fig. S15.** Side-on view showing molecular packing of two sets of the supramolecular dimer of **1** molecules as a part of columnar superstructure held together employing multiple inter and intra-layer CH $\cdots$  $\pi$  interaction. Bond lengths are shown in red and torsional angles in green.

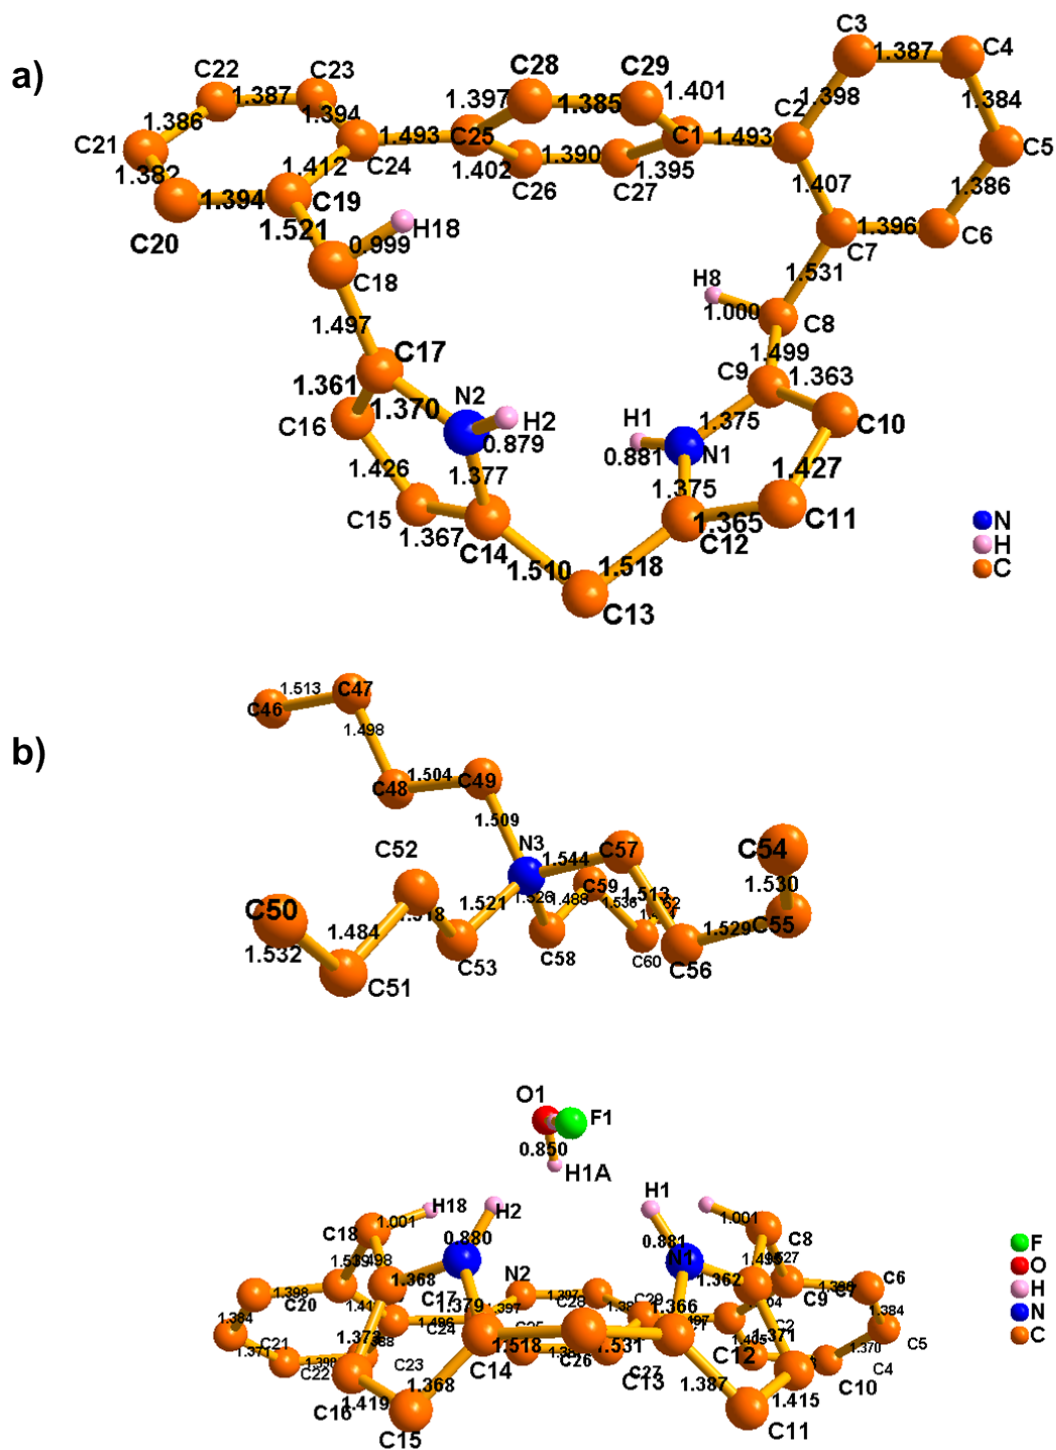

| Crystal parameters                                  | <b>1</b>                                                           | <b>1.F</b>                                                         |
|-----------------------------------------------------|--------------------------------------------------------------------|--------------------------------------------------------------------|
| Formula                                             | C <sub>45</sub> H <sub>40</sub> N <sub>2</sub>                     | C <sub>61</sub> H <sub>78</sub> FN <sub>3</sub> O                  |
| <i>M</i> /g mol <sup>-1</sup>                       | 608.79                                                             | 888.26                                                             |
| <i>T</i> /K                                         | 111.5(10) K                                                        | 100.00(10) K                                                       |
| Crystal dimensions/mm <sup>3</sup>                  | 0.2 × 0.1 × 0.1                                                    | 0.2 × 0.1 × 0.1                                                    |
| Crystal system                                      | monoclinic                                                         | monoclinic                                                         |
| Space group                                         | <i>P</i> 2 <sub>1</sub> / <i>c</i>                                 | <i>P</i> 2 <sub>1</sub> / <i>n</i>                                 |
| <i>a</i> /Å                                         | 18.0411(2)                                                         | 14.0491(11)                                                        |
| <i>b</i> /Å                                         | 25.9133(3)                                                         | 21.1710(12)                                                        |
| <i>c</i> /Å                                         | 7.63460(10)                                                        | 18.6212(16)                                                        |
| $\alpha$ /°                                         | 90                                                                 | 90                                                                 |
| $\beta$ /°                                          | 95.6400(10)                                                        | 106.367(9)                                                         |
| $\gamma$ /°                                         | 90                                                                 | 90                                                                 |
| <i>V</i> /Å <sup>3</sup>                            | 3551.93(7)                                                         | 5314.1(7)                                                          |
| <i>Z</i>                                            | 4                                                                  | 4                                                                  |
| $\rho$ <sub>calcd</sub> /mg m <sup>-3</sup>         | 1.138                                                              | 1.110                                                              |
| $\mu$ /mm <sup>-1</sup>                             | 0.497                                                              | 0.516                                                              |
| <i>F</i> (000)                                      | 1296.0                                                             | 1928.0                                                             |
| Reflns. collected                                   | 26987                                                              | 35027                                                              |
| Indep.reflns.[ <i>R</i> (int)]                      | 7285 [0.0546]                                                      | 10615 [0.0564]                                                     |
| Max/min transmission                                | 1.000, 0.589                                                       | 1.000, 0.831                                                       |
| Data/restraints/parameters                          | 7285/0/427                                                         | 10615/2/600                                                        |
| GOF on <i>F</i> <sup>2</sup>                        | 1.104                                                              | 1.069                                                              |
| Final <i>R</i> indices [ <i>I</i> > 2σ( <i>I</i> )] | <i>R</i> <sub>1</sub> = 0.0538,<br><i>wR</i> <sub>2</sub> = 0.1537 | <i>R</i> <sub>1</sub> = 0.1198,<br><i>wR</i> <sub>2</sub> = 0.2606 |
| <i>R</i> indices (all data)                         | <i>R</i> <sub>1</sub> = 0.0595,<br><i>wR</i> <sub>2</sub> = 0.1579 | <i>R</i> <sub>1</sub> = 0.1620,<br><i>wR</i> <sub>2</sub> = 0.2856 |
| Largest diff peak and hole [e Å <sup>-3</sup> ]     | 0.27 and -0.26                                                     | 0.68 and -1.24                                                     |

**Table S1.** Crystal data for **1** and **1.F**

The crystals have been deposited in the Cambridge Crystallographic Data Centre with reference no. **CCDC 2350180 (1)** and **CCDC 2350181 (1.F)**. These data can be obtained free of charge from the Cambridge Crystallographic Data Centre via [www.ccdc.cam.ac.uk/data\\_request/cif](http://www.ccdc.cam.ac.uk/data_request/cif).

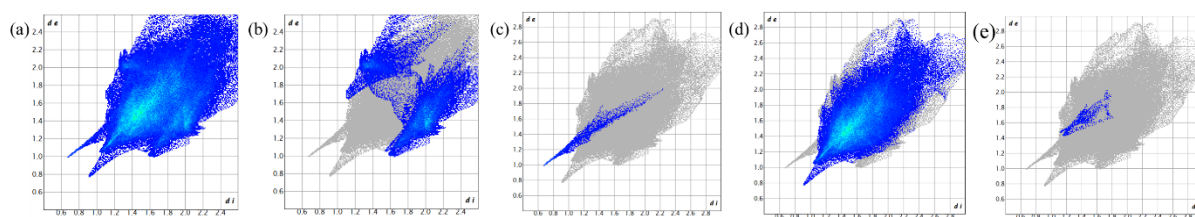

**Fig. S17.** The full Hirshfeld surface fingerprint (HS-FP) of **1.F** (a) as well as the contributions from H $\cdots$ C (b), H $\cdots$ F (c), H $\cdots$ H (d), and H $\cdots$ O (e) contacts.

**Table S2.** The % surface area of particular atom-atom interactions to the overall surface.

| Interaction type | %    |
|------------------|------|
| H $\cdots$ C     | 20.2 |
| H $\cdots$ F     | 1.7  |
| H $\cdots$ H     | 77.2 |
| H $\cdots$ O     | 0.8  |

#### 4. Electronic absorption spectral analysis

| Compd.     | $\lambda_{\max}/\text{nm}$ ( $\epsilon[\text{M}^{-1}\text{cm}^{-1}]\times 10^4$ ) |
|------------|-----------------------------------------------------------------------------------|
| <b>1</b>   | 252 (4.47), 264 (3.89)                                                            |
| <b>1.F</b> | 252 (7.37), 266 (10.19), 363 (1.13)                                               |

Table S3. The electronic absorption spectral data of **1** and **1.F**

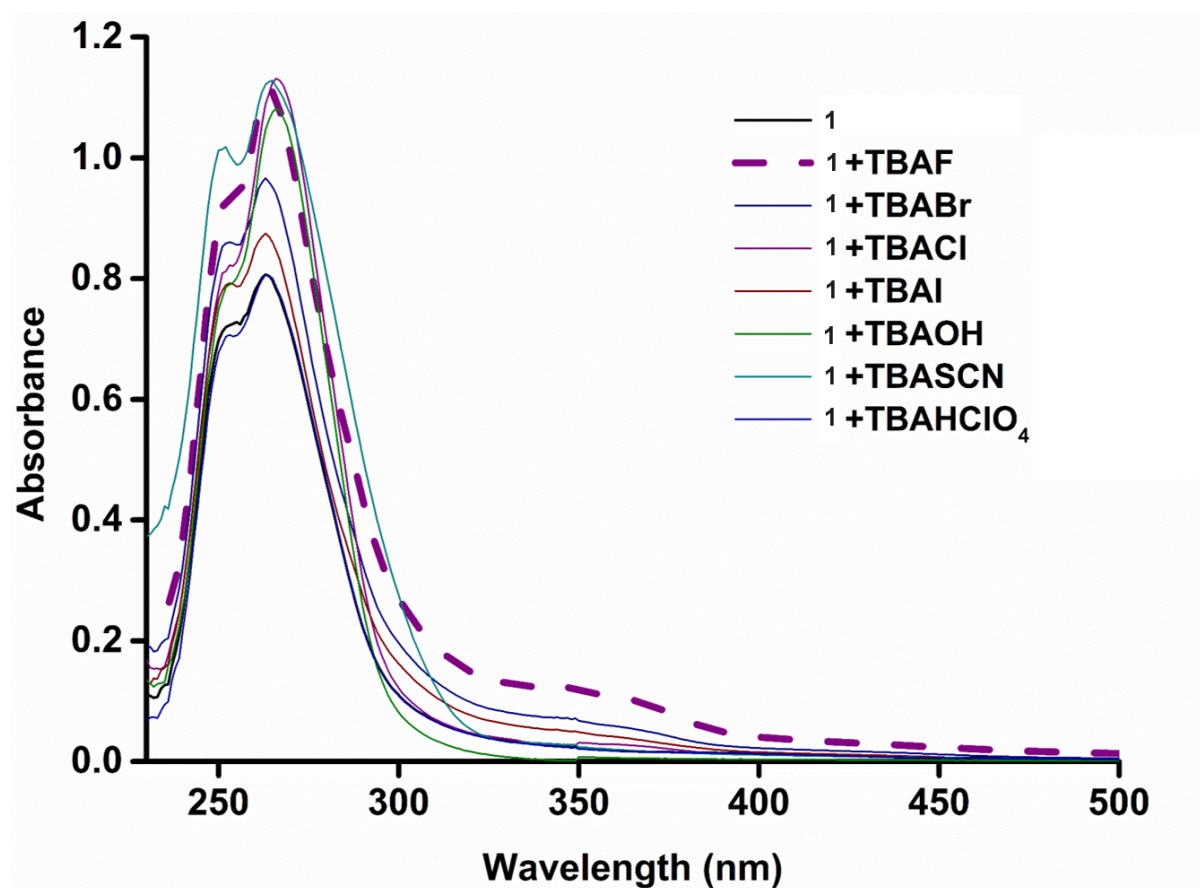

Fig. S18. Electronic absorption spectra of **1** with different anion salts (excess) in  $\text{CH}_3\text{CN}$ .



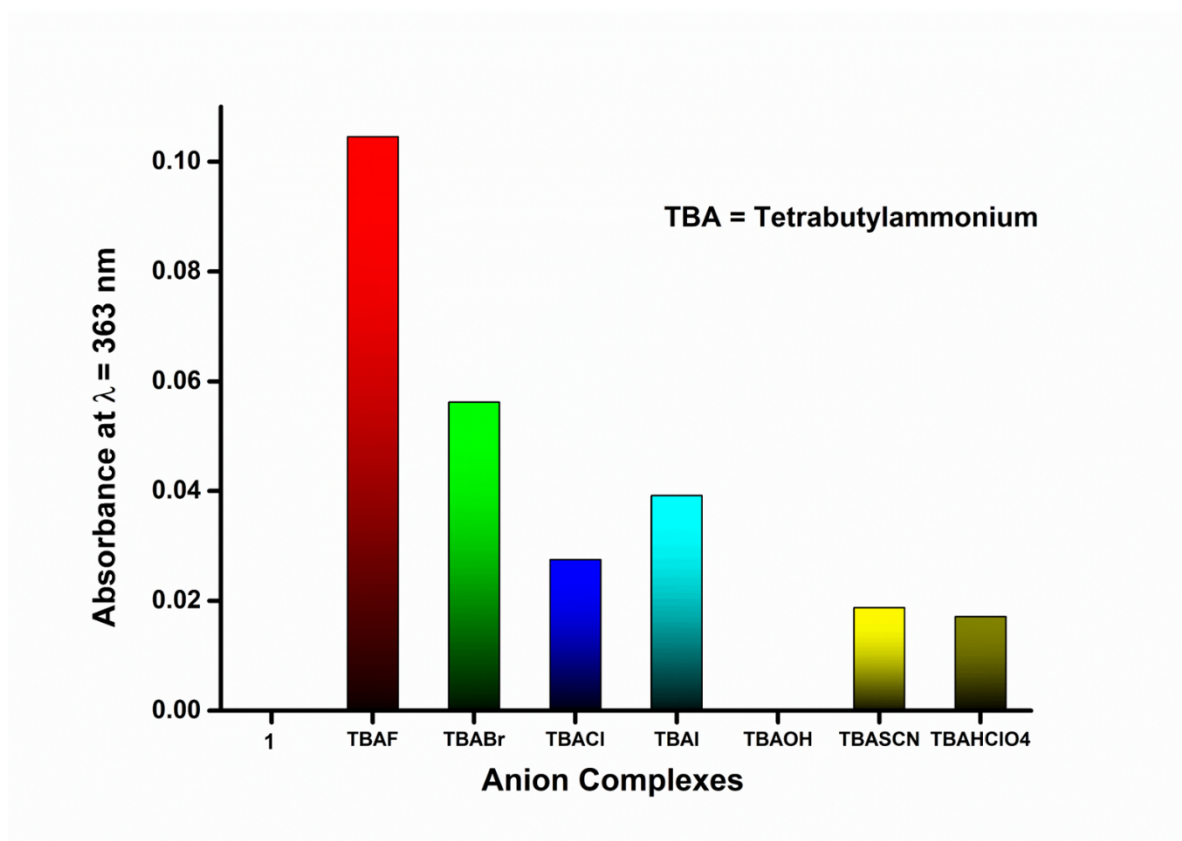

**Fig. S19.** Bar graph of intensities at 363 nm wavelength of **1** with different anion salts. (~20 eq. of each anion salts were taken)

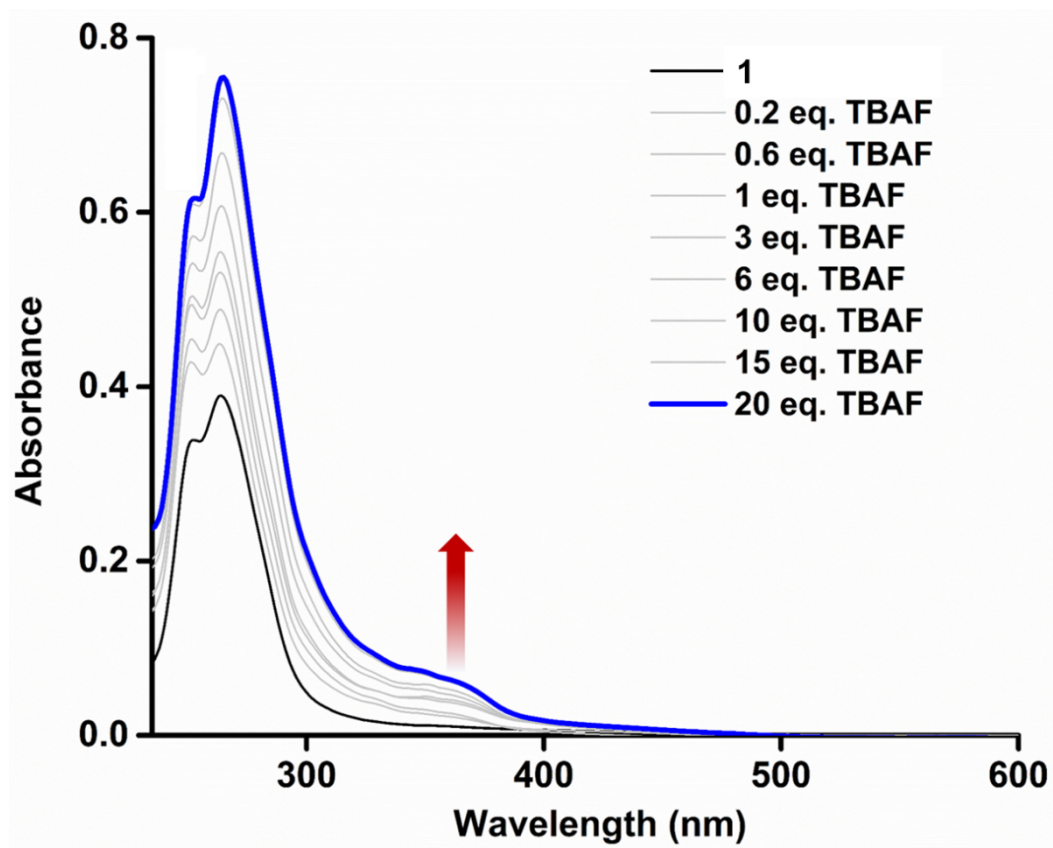

Fig. S20. Electronic absorption spectra of **1** in different equivalents of TBAF in  $\text{CH}_3\text{CN}$ .

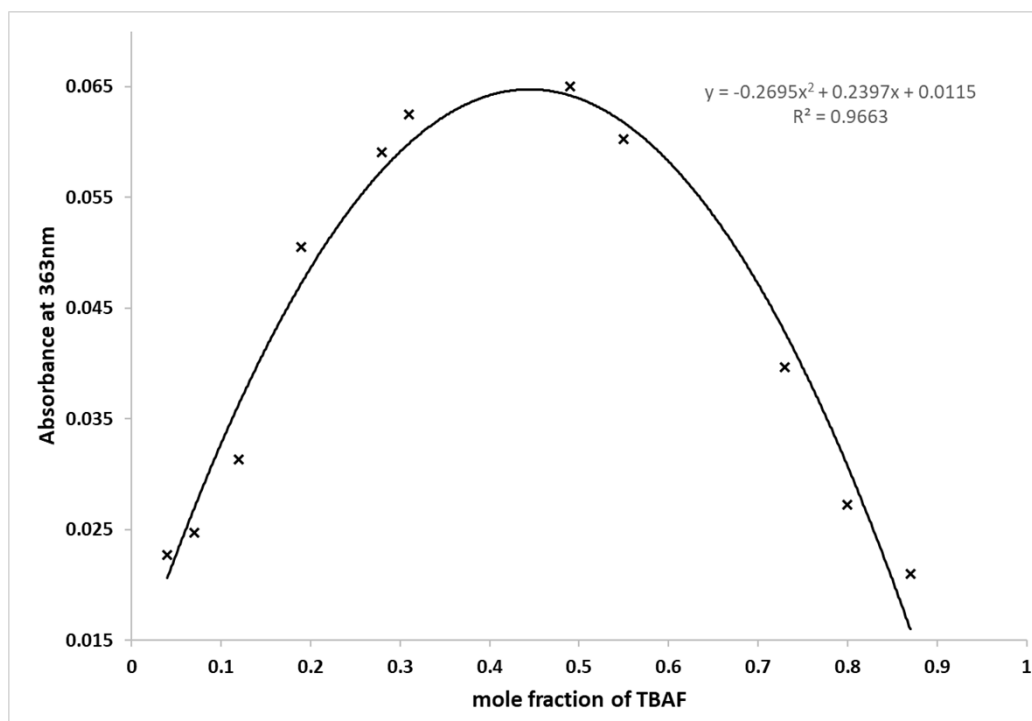

Fig. S21. Job's plot analysis of **1** with TBAF salt in  $\text{CH}_3\text{CN}$  at  $25\text{ }^\circ\text{C}$ .

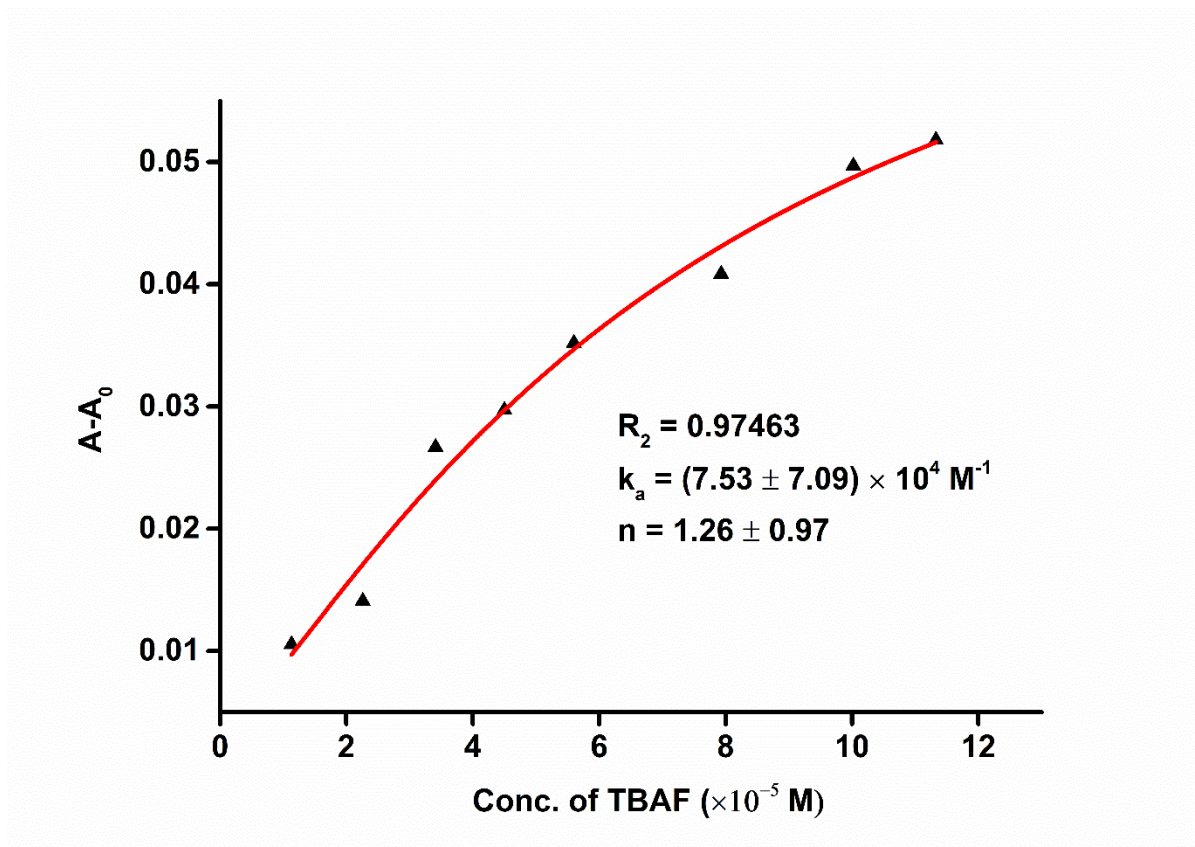

**Fig. S22.** The nonlinear fit to Hill equation of UV-Vis titration experiments based on the absorption band centered at 363 nm for **1** at different TBAF concentrations.

## 5. Theoretical Calculations:

Geometry optimization for all analysed structures were carried out with the Gaussian 09W<sup>[S1]</sup> software package within unconstrained C1 symmetry, with starting coordinates derived from X-ray analysis if available. The structure of the **1** and **1.F** in ground ( $S_0$ ) states were optimized with the use of the density functional theory (DFT) approach, Becke's three-parameter hybrid exchange functional and the Lee–Yang–Parr correlation functional (B3LYP), and basis set 6-311G(d, p) for C, H, N, F atoms. While TD-DFT methods were employed to acquire the vertical excitation energies for  $S_0$ - $S_n$  transitions, similar basis sets was used to obtain oscillator strengths using the B3LYP method. On the basis of the optimized structures in the  $S_0$  state, the electronic absorption spectra and oscillator strengths were fully studied using TD-DFT method. The GIAO chemical shifts were calculated using the B3LYP method with the same basis sets. The polarizable continuum model of solvation was used (IEFPCM [Integral Equation Formalism Polarizable Continuum Model] as standard acetonitrile parametrization) for all optimizations.

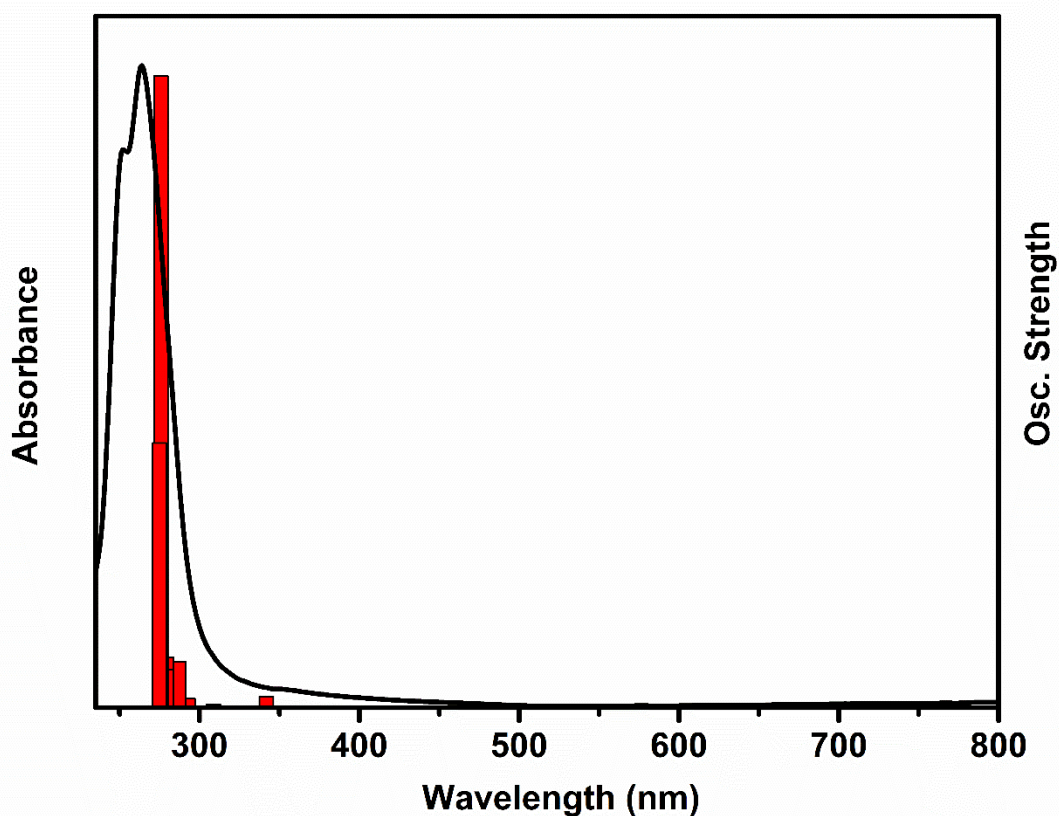

**Fig. S23.** Absorption spectrum of **1** along with the calculated vertical transitions (red) obtained by TD-DFT (B3LYP/6-311G (d, p), solvent=acetonitrile) method.

**Table S4:** Selected TD-DFT calculated energies, oscillator strengths and compositions of the major electronic transitions of **1**. The terms H and L refer to HOMO and LUMO, respectively.

| Energy(eV) | Wavelength(nm) | Oscillator strength, f | Major Transitions                                                                |
|------------|----------------|------------------------|----------------------------------------------------------------------------------|
| 3.6269     | 341.84         | 0.0023                 | H -> L (99.06%)                                                                  |
| 4.0158     | 308.74         | 0.0007                 | H-1 -> L (91.66%)<br>H-> L+2 (7.55%)                                             |
| 4.2344     | 292.80         | 0.0019                 | H -> L+1 (97.84%)                                                                |
| 4.3202     | 286.99         | 0.0093                 | H-1 -> L (7.49%)<br>H-> L+2 (89.07%)                                             |
| 4.4353     | 279.54         | 0.0102                 | H-2 -> L (13.46%)<br>H-1-> L+2 (4.10%)<br>H-1 -> L+5 (3.86%)<br>H-> L+3 (75.08%) |

|        |        |        |                                                                                                       |
|--------|--------|--------|-------------------------------------------------------------------------------------------------------|
|        |        |        | H -> L+6 (2.44%)                                                                                      |
| 4.4386 | 279.33 | 0.0077 | H-1 -> L+1 (8.68%)<br>H-1-> L+6 (2.13%)<br>H -> L+4 (85.31%)                                          |
| 4.4950 | 275.83 | 0.1279 | H-2 -> L (27.29%)<br>H-1-> L+2 (2.50%)<br>H-1 -> L+4 (4.16%)<br>H-> L+3 (10.41%)<br>H -> L+6 (54.19%) |
| 4.5120 | 274.79 | 0.0536 | H-1 -> L+3 (3.91%)<br>H -> L+5 (90.99%)                                                               |

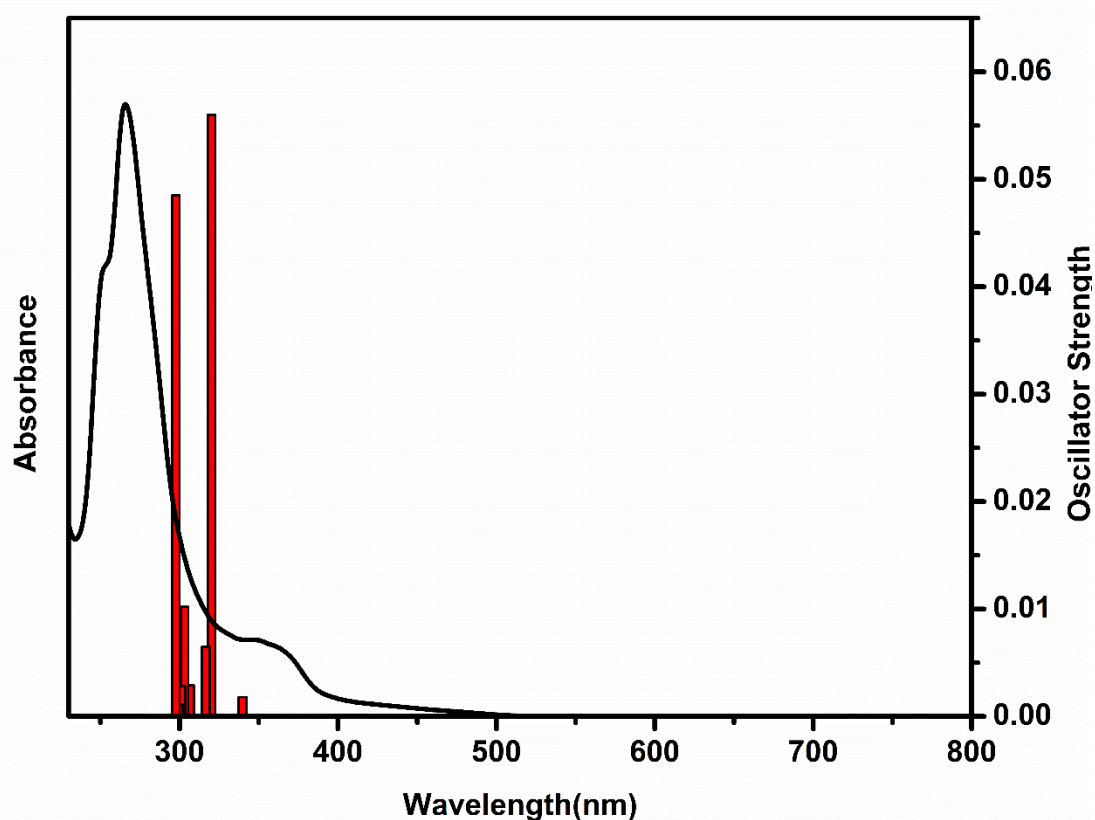

**Fig. S24.** Absorption spectrum of **1.F** along with the calculated vertical transitions (red) obtained by TD-DFT (B3LYP/6-311G(d,p)) method.

**Table S5:** Selected TD-DFT calculated energies, oscillator strengths and compositions of the major electronic transitions of **1.F**. The terms H and L refer to HOMO and LUMO, respectively.

| Energy(eV) | Wavelength(nm) | Oscillator strength, f | Major Transitions                                                                                                                            |
|------------|----------------|------------------------|----------------------------------------------------------------------------------------------------------------------------------------------|
| 3.6498     | 339.70         | 0.0018                 | H -> L (98.03%)                                                                                                                              |
| 3.8726     | 320.16         | 0.0560                 | H-1 -> L (2.68%)<br>H-> L+1 (95.04%)                                                                                                         |
| 3.9177     | 316.47         | 0.0065                 | H-1 -> L (13.44%)<br>H -> L+2 (83.54%)                                                                                                       |
| 4.0420     | 306.74         | 0.0029                 | H-1 -> L+1 (4.88%)<br>H-1 -> L+3 (2.37%)<br>H -> L+3 (84.59%)<br>H-> L+4 (2.83%)<br>H-> L+5 (2.55%)                                          |
| 4.0895     | 303.17         | 0.0102                 | H-1 -> L+1 (2.25%)<br>H-1 -> L+3 (3.69%)<br>H -> L+3 (4.77%)<br>H-> L+4 (79.32%)<br>H-> L+5 (5.52%)                                          |
| 4.1160     | 301.22         | 0.0028                 | H-1 -> L (13.78%)<br>H-1 -> L+2 (4.18%)<br>H-1 -> L+4 (2.31%)<br>H-> L+2 (2.15%)<br>H-> L+4 (4.87%)<br>H -> L+5 (65.80%)<br>H -> L+6 (2.67%) |
| 4.1377     | 299.64         | 0.0011                 | H-1 -> L (65.87%)<br>H-1 -> L+5 (2.33%)<br>H -> L+2 (10.95%)<br>H-> L+4 (3.53%)<br>H-> L+5 (13.00%)                                          |
| 4.1664     | 297.58         | 0.0485                 | H-1 -> L+1 (7.45%)<br>H-1 -> L+2 (4.94%)<br>H -> L+5 (2.18%)<br>H-> L+6 (81.23%)                                                             |

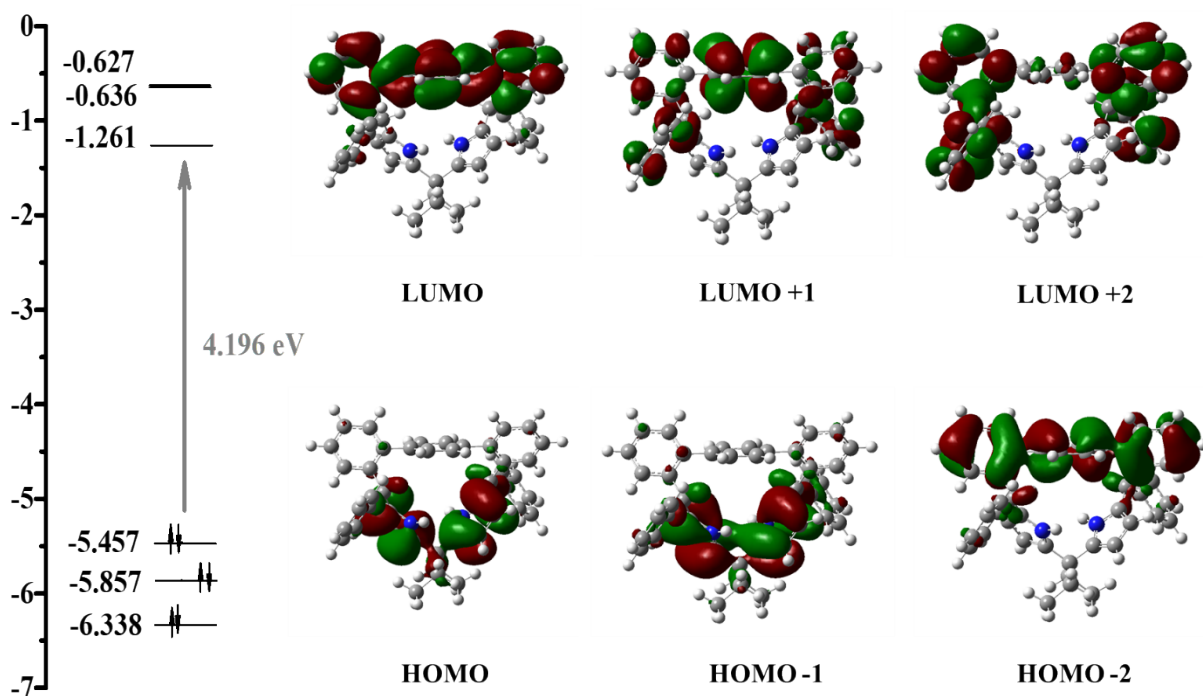

**Fig. S25.** Kohn–Sham orbital energy level diagram of **1** selected orbitals calculated at the B3LYP/6-311G(d, p) level of theory and contour plots of selected orbitals (isovalue of 0.02 au).

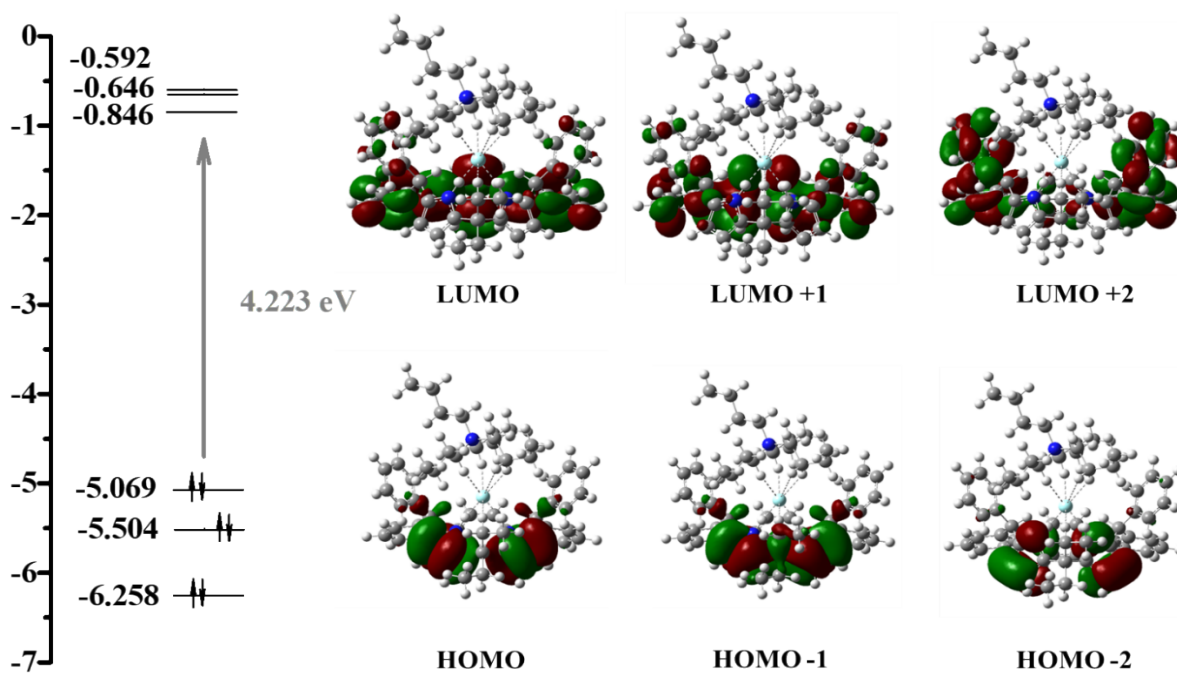

**Fig. S26.** Kohn–Sham orbital energy level diagram of **1.F** selected orbitals calculated at the B3LYP/6-311G (d, p) level of theory and contour plots of selected orbitals (isovalue of 0.02 au).



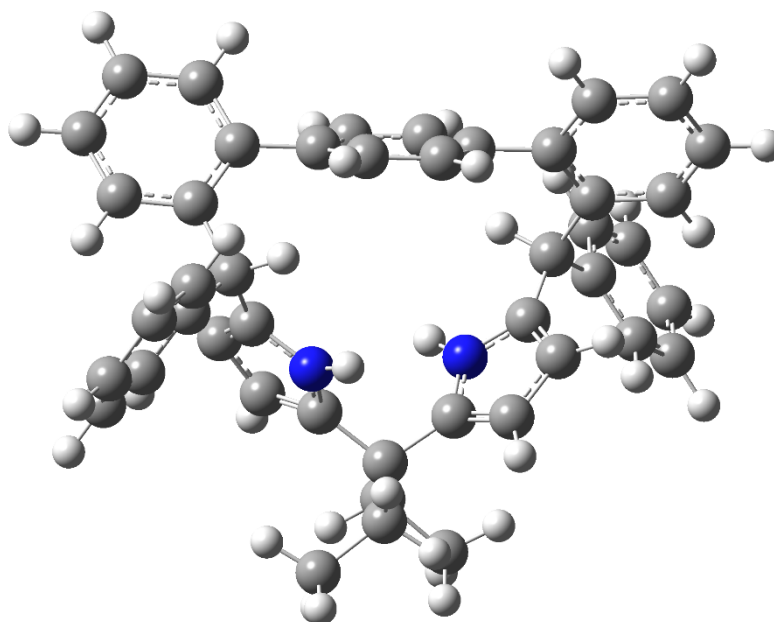

**Fig. S27.** Optimized structure of **1** calculated at the B3LYP/(6-311G (d, p)) level (Solvent = Acetonitrile).

**Table S6:** Cartesian coordinates of the optimized geometry of **1** optimized at B3LYP/(6-311G (d, p)) level (Solvent = Acetonitrile).

# Sum of imaginary frequencies = 0

# Total Energy (Hartree) = -1848.845865 Hartree

Optimized structure coordinates:

| -----  |        |        |                         |           |           |
|--------|--------|--------|-------------------------|-----------|-----------|
| Center | Atomic | Atomic | Coordinates (Angstroms) |           |           |
| Number | Number | Type   | X                       | Y         | Z         |
| -----  |        |        |                         |           |           |
| 1      | 7      | 0      | 1.706519                | 1.386174  | 0.166934  |
| 2      | 1      | 0      | 1.501644                | 1.218768  | 1.140590  |
| 3      | 7      | 0      | -1.706508               | 1.386175  | -0.166928 |
| 4      | 1      | 0      | -1.501612               | 1.218755  | -1.140578 |
| 5      | 6      | 0      | 4.680391                | 0.100564  | 0.731552  |
| 6      | 6      | 0      | 3.674096                | -1.622185 | -0.878692 |
| 7      | 6      | 0      | 2.570066                | 0.625696  | -0.588942 |
| 8      | 6      | 0      | 3.406593                | -0.442899 | 0.070021  |

|    |   |   |           |           |           |
|----|---|---|-----------|-----------|-----------|
| 9  | 1 | 0 | 2.802240  | -0.829523 | 0.892074  |
| 10 | 6 | 0 | -1.065949 | 2.327395  | 0.608331  |
| 11 | 6 | 0 | -1.319608 | -2.590349 | 0.534097  |
| 12 | 6 | 0 | 1.319591  | -2.590362 | -0.534043 |
| 13 | 6 | 0 | 1.065947  | 2.327389  | -0.608322 |
| 14 | 6 | 0 | 1.096963  | -2.621479 | 0.849057  |
| 15 | 1 | 0 | 1.936596  | -2.673013 | 1.532389  |
| 16 | 6 | 0 | -2.686854 | -2.603800 | 1.138273  |
| 17 | 6 | 0 | -2.570073 | 0.625707  | 0.588938  |
| 18 | 6 | 0 | 0.000005  | 3.229567  | 0.000011  |
| 19 | 6 | 0 | 5.217037  | -0.578584 | 1.832812  |
| 20 | 1 | 0 | 4.722746  | -1.471308 | 2.202827  |
| 21 | 6 | 0 | -3.674113 | -1.622161 | 0.878701  |
| 22 | 6 | 0 | -0.193592 | -2.608399 | 1.369953  |
| 23 | 1 | 0 | -0.330276 | -2.612570 | 2.445387  |
| 24 | 6 | 0 | 2.686833  | -2.603830 | -1.138227 |
| 25 | 6 | 0 | -2.979654 | -3.633582 | 2.044897  |
| 26 | 1 | 0 | -2.227785 | -4.392343 | 2.230703  |
| 27 | 6 | 0 | 4.900182  | -1.715883 | -1.544619 |
| 28 | 1 | 0 | 5.660441  | -0.968972 | -1.352964 |
| 29 | 6 | 0 | -1.546566 | 2.169831  | 1.895006  |
| 30 | 1 | 0 | -1.253038 | 2.749518  | 2.756014  |
| 31 | 6 | 0 | -3.406591 | -0.442893 | -0.070028 |
| 32 | 1 | 0 | -2.802222 | -0.829531 | -0.892064 |
| 33 | 6 | 0 | 0.193574  | -2.608443 | -1.369899 |
| 34 | 1 | 0 | 0.330258  | -2.612647 | -2.445332 |
| 35 | 6 | 0 | 2.979622  | -3.633634 | -2.044830 |
| 36 | 1 | 0 | 2.227751  | -4.392400 | -2.230608 |

|    |   |   |           |           |           |
|----|---|---|-----------|-----------|-----------|
| 37 | 6 | 0 | -1.096981 | -2.621509 | -0.849002 |
| 38 | 1 | 0 | -1.936614 | -2.673066 | -1.532332 |
| 39 | 6 | 0 | 5.331153  | 1.251492  | 0.279092  |
| 40 | 1 | 0 | 4.923473  | 1.796209  | -0.564693 |
| 41 | 6 | 0 | -4.207537 | -3.712044 | 2.695270  |
| 42 | 1 | 0 | -4.404901 | -4.524557 | 3.385229  |
| 43 | 6 | 0 | -2.491715 | 1.099097  | 1.882361  |
| 44 | 1 | 0 | -3.048778 | 0.720415  | 2.725679  |
| 45 | 6 | 0 | -4.900209 | -1.715845 | 1.544611  |
| 46 | 1 | 0 | -5.660465 | -0.968939 | 1.352927  |
| 47 | 6 | 0 | -4.680374 | 0.100564  | -0.731592 |
| 48 | 6 | 0 | 4.207495  | -3.712111 | -2.695219 |
| 49 | 1 | 0 | 4.404849  | -4.524641 | -3.385161 |
| 50 | 6 | 0 | -5.172875 | -2.743154 | 2.445563  |
| 51 | 1 | 0 | -6.135548 | -2.783725 | 2.942591  |
| 52 | 6 | 0 | 6.374819  | -0.125573 | 2.460304  |
| 53 | 1 | 0 | 6.770911  | -0.664412 | 3.314013  |
| 54 | 6 | 0 | 0.621143  | 4.110422  | 1.124260  |
| 55 | 1 | 0 | -0.181223 | 4.672130  | 1.610135  |
| 56 | 1 | 0 | 1.029978  | 3.449804  | 1.894478  |
| 57 | 6 | 0 | -0.621122 | 4.110446  | -1.124226 |
| 58 | 1 | 0 | 0.181252  | 4.672139  | -1.610105 |
| 59 | 1 | 0 | -1.029981 | 3.449843  | -1.894445 |
| 60 | 6 | 0 | 5.172835  | -2.743213 | -2.445551 |
| 61 | 1 | 0 | 6.135501  | -2.783794 | -2.942593 |
| 62 | 6 | 0 | 2.491682  | 1.099072  | -1.882369 |
| 63 | 1 | 0 | 3.048727  | 0.720379  | -2.725694 |
| 64 | 6 | 0 | 7.019364  | 1.021496  | 1.996064  |

|    |   |   |           |           |           |
|----|---|---|-----------|-----------|-----------|
| 65 | 1 | 0 | 7.919150  | 1.378186  | 2.484486  |
| 66 | 6 | 0 | 1.546537  | 2.169809  | -1.895006 |
| 67 | 1 | 0 | 1.252992  | 2.749487  | -2.756014 |
| 68 | 6 | 0 | 6.492772  | 1.707697  | 0.904085  |
| 69 | 1 | 0 | 6.982705  | 2.603112  | 0.537490  |
| 70 | 6 | 0 | -5.331137 | 1.251506  | -0.279171 |
| 71 | 1 | 0 | -4.923468 | 1.796240  | 0.564609  |
| 72 | 6 | 0 | 1.716663  | 5.076985  | 0.667797  |
| 73 | 1 | 0 | 2.529109  | 4.549898  | 0.161031  |
| 74 | 1 | 0 | 2.141664  | 5.595088  | 1.531504  |
| 75 | 1 | 0 | 1.334721  | 5.839745  | -0.015255 |
| 76 | 6 | 0 | -5.217004 | -0.578605 | -1.832848 |
| 77 | 1 | 0 | -4.722711 | -1.471340 | -2.202835 |
| 78 | 6 | 0 | -1.716615 | 5.077031  | -0.667746 |
| 79 | 1 | 0 | -2.141622 | 5.595139  | -1.531446 |
| 80 | 1 | 0 | -1.334646 | 5.839786  | 0.015296  |
| 81 | 1 | 0 | -2.529062 | 4.549962  | -0.160962 |
| 82 | 6 | 0 | -6.492742 | 1.707704  | -0.904195 |
| 83 | 1 | 0 | -6.982675 | 2.603130  | -0.537631 |
| 84 | 6 | 0 | -7.019317 | 1.021482  | -1.996169 |
| 85 | 1 | 0 | -7.919092 | 1.378166  | -2.484617 |
| 86 | 6 | 0 | -6.374771 | -0.125601 | -2.460372 |
| 87 | 1 | 0 | -6.770850 | -0.664457 | -3.314077 |

---

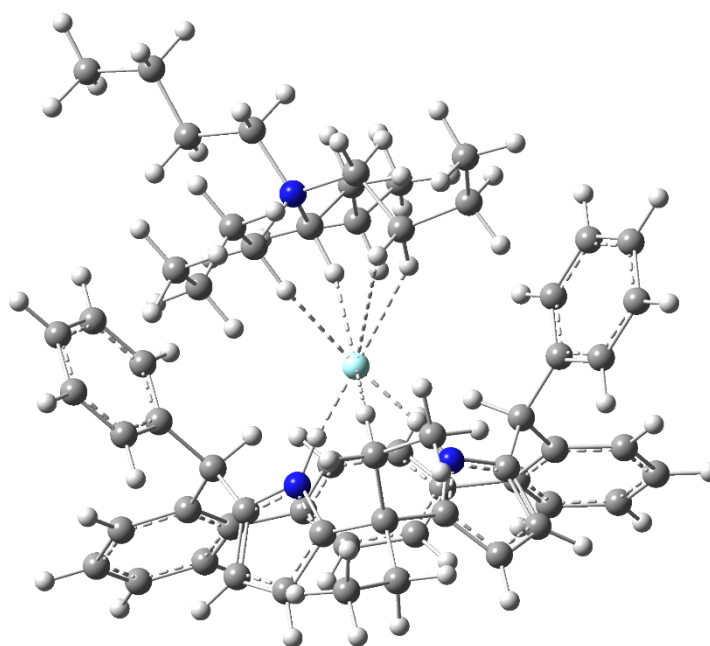

**Fig. S28.** Optimized structure of **1.F** calculated at the B3LYP/(6-311G (d, p)) level. (Solvent = Acetonitrile)

**Table S7:** Cartesian coordinates of the optimized geometry of **1.F** optimized at B3LYP/(6-311G (d, p)) level (Solvent = Acetonitrile).

# Sum of imaginary frequencies = 0

# Total Energy (Hartree) = -2635.077509 Hartree

Optimized structure coordinates:

| -----  |        |        |                         |           |           |  |
|--------|--------|--------|-------------------------|-----------|-----------|--|
| Center | Atomic | Atomic | Coordinates (Angstroms) |           |           |  |
| Number | Number | Type   | X                       | Y         | Z         |  |
| -----  |        |        |                         |           |           |  |
| 1      | 9      | 0      | 0.232299                | -0.571193 | 0.561391  |  |
| 2      | 7      | 0      | -2.232505               | -0.263721 | 1.609108  |  |
| 3      | 1      | 0      | -1.310082               | -0.442136 | 1.164874  |  |
| 4      | 7      | 0      | 0.069690                | 1.841082  | 1.725001  |  |
| 5      | 1      | 0      | 0.202603                | 0.926810  | 1.246586  |  |
| 6      | 6      | 0      | -3.269671               | 2.228769  | -0.690718 |  |
| 7      | 1      | 0      | -3.895194               | 2.075142  | 0.179741  |  |

|    |   |   |           |           |           |
|----|---|---|-----------|-----------|-----------|
| 8  | 6 | 0 | -2.251897 | 3.174309  | -0.645154 |
| 9  | 1 | 0 | -2.095615 | 3.747324  | 0.260183  |
| 10 | 6 | 0 | -1.427253 | 3.401454  | -1.754204 |
| 11 | 6 | 0 | -0.390308 | 4.479945  | -1.709496 |
| 12 | 6 | 0 | -2.683690 | 1.703083  | -2.959645 |
| 13 | 1 | 0 | -2.845990 | 1.136547  | -3.870263 |
| 14 | 6 | 0 | -3.503909 | 1.475372  | -1.847876 |
| 15 | 6 | 0 | 1.121441  | 3.100520  | -0.158859 |
| 16 | 1 | 0 | 0.691210  | 2.277720  | -0.740185 |
| 17 | 6 | 0 | -1.660483 | 2.651578  | -2.913309 |
| 18 | 1 | 0 | -1.039486 | 2.810671  | -3.788310 |
| 19 | 6 | 0 | 0.783982  | 4.385931  | -0.929186 |
| 20 | 6 | 0 | 0.445020  | 3.049820  | 1.190886  |
| 21 | 6 | 0 | 2.632269  | 2.839366  | -0.117022 |
| 22 | 6 | 0 | -3.480403 | -1.158338 | -0.360620 |
| 23 | 1 | 0 | -2.597426 | -0.775151 | -0.883207 |
| 24 | 6 | 0 | -4.658924 | 0.525002  | -1.902743 |
| 25 | 6 | 0 | 1.653168  | 5.481961  | -0.896979 |
| 26 | 1 | 0 | 2.561321  | 5.417727  | -0.309861 |
| 27 | 6 | 0 | -4.695641 | -0.684675 | -1.173417 |
| 28 | 6 | 0 | -3.440847 | -0.547214 | 1.020344  |
| 29 | 6 | 0 | -0.627794 | 5.646479  | -2.449112 |
| 30 | 1 | 0 | -1.527155 | 5.707492  | -3.052162 |
| 31 | 6 | 0 | 0.251212  | 6.725526  | -2.409215 |
| 32 | 1 | 0 | 0.041591  | 7.618586  | -2.987139 |
| 33 | 6 | 0 | -2.422687 | 0.340160  | 2.831860  |
| 34 | 6 | 0 | -6.909112 | 0.094264  | -2.737161 |
| 35 | 1 | 0 | -7.752495 | 0.398444  | -3.346809 |
| 36 | 6 | 0 | -5.764267 | 0.885061  | -2.685678 |
| 37 | 1 | 0 | -5.724381 | 1.811104  | -3.248829 |
| 38 | 6 | 0 | -4.434631 | -0.140056 | 1.890370  |
| 39 | 1 | 0 | -5.497829 | -0.214735 | 1.716850  |

|    |   |   |           |           |           |
|----|---|---|-----------|-----------|-----------|
| 40 | 6 | 0 | -5.856577 | -1.463786 | -1.232898 |
| 41 | 1 | 0 | -5.893187 | -2.398273 | -0.686251 |
| 42 | 6 | 0 | 0.035651  | 4.037940  | 2.066013  |
| 43 | 1 | 0 | 0.174743  | 5.100321  | 1.932235  |
| 44 | 6 | 0 | 1.392537  | 6.645653  | -1.617512 |
| 45 | 1 | 0 | 2.085792  | 7.477932  | -1.567494 |
| 46 | 6 | 0 | 3.274518  | 2.360625  | -1.266619 |
| 47 | 1 | 0 | 2.689962  | 2.161090  | -2.159298 |
| 48 | 6 | 0 | 3.405096  | 3.084081  | 1.020807  |
| 49 | 1 | 0 | 2.921964  | 3.445324  | 1.921433  |
| 50 | 6 | 0 | -3.347553 | -2.686641 | -0.376534 |
| 51 | 6 | 0 | -6.958447 | -1.081391 | -1.994938 |
| 52 | 1 | 0 | -7.843458 | -1.707596 | -2.015875 |
| 53 | 6 | 0 | -0.602190 | 2.026909  | 2.912970  |
| 54 | 6 | 0 | -3.792622 | 0.418835  | 3.034388  |
| 55 | 1 | 0 | -4.284974 | 0.843077  | 3.895679  |
| 56 | 6 | 0 | 5.413413  | 2.401364  | -0.142555 |
| 57 | 1 | 0 | 6.484752  | 2.235399  | -0.153053 |
| 58 | 6 | 0 | -1.245136 | 0.856924  | 3.663322  |
| 59 | 6 | 0 | -0.626252 | 3.393621  | 3.151313  |
| 60 | 1 | 0 | -1.078241 | 3.884737  | 3.998904  |
| 61 | 6 | 0 | 4.784716  | 2.869860  | 1.008983  |
| 62 | 1 | 0 | 5.366434  | 3.070284  | 1.902129  |
| 63 | 6 | 0 | -0.189633 | -0.278785 | 3.850684  |
| 64 | 1 | 0 | 0.168254  | -0.575627 | 2.863199  |
| 65 | 1 | 0 | 0.673580  | 0.141818  | 4.375745  |
| 66 | 6 | 0 | 4.650252  | 2.144458  | -1.282936 |
| 67 | 1 | 0 | 5.127352  | 1.776368  | -2.184547 |
| 68 | 6 | 0 | -3.736419 | -3.486095 | 0.701253  |
| 69 | 1 | 0 | -4.116141 | -3.014642 | 1.600425  |
| 70 | 6 | 0 | -0.687698 | -1.522159 | 4.594022  |
| 71 | 1 | 0 | -0.977160 | -1.302443 | 5.625029  |

|     |   |   |           |           |           |
|-----|---|---|-----------|-----------|-----------|
| 72  | 1 | 0 | 0.100449  | -2.279861 | 4.630265  |
| 73  | 1 | 0 | -1.551762 | -1.966477 | 4.092829  |
| 74  | 6 | 0 | -1.787778 | 1.341696  | 5.034788  |
| 75  | 1 | 0 | -2.452533 | 2.192423  | 4.859931  |
| 76  | 1 | 0 | -2.421369 | 0.551187  | 5.445364  |
| 77  | 6 | 0 | -2.847874 | -3.315407 | -1.524482 |
| 78  | 1 | 0 | -2.538473 | -2.710213 | -2.370815 |
| 79  | 6 | 0 | -3.643970 | -4.877402 | 0.629874  |
| 80  | 1 | 0 | -3.955390 | -5.479966 | 1.476276  |
| 81  | 6 | 0 | -3.154245 | -5.491459 | -0.520632 |
| 82  | 1 | 0 | -3.081840 | -6.571816 | -0.576159 |
| 83  | 6 | 0 | -2.751827 | -4.702742 | -1.599551 |
| 84  | 1 | 0 | -2.362770 | -5.168128 | -2.498626 |
| 85  | 6 | 0 | -0.742179 | 1.727183  | 6.088210  |
| 86  | 1 | 0 | -1.240378 | 2.139695  | 6.970441  |
| 87  | 1 | 0 | -0.043719 | 2.480246  | 5.718534  |
| 88  | 1 | 0 | -0.158081 | 0.865264  | 6.420101  |
| 89  | 7 | 0 | 3.085858  | -2.573336 | -0.662572 |
| 90  | 6 | 0 | 3.411143  | -1.561325 | 0.437968  |
| 91  | 1 | 0 | 3.830688  | -0.693763 | -0.070903 |
| 92  | 1 | 0 | 2.443075  | -1.257308 | 0.837826  |
| 93  | 6 | 0 | 4.343914  | -3.017619 | -1.405437 |
| 94  | 1 | 0 | 4.985192  | -3.478527 | -0.655458 |
| 95  | 1 | 0 | 4.028370  | -3.807694 | -2.086333 |
| 96  | 6 | 0 | 2.472815  | -3.845404 | -0.078830 |
| 97  | 1 | 0 | 2.172737  | -4.447409 | -0.935691 |
| 98  | 1 | 0 | 3.292741  | -4.369436 | 0.409103  |
| 99  | 6 | 0 | 5.113592  | -1.941764 | -2.165427 |
| 100 | 1 | 0 | 4.496638  | -1.506895 | -2.956034 |
| 101 | 1 | 0 | 5.406835  | -1.126693 | -1.498401 |
| 102 | 6 | 0 | 2.101987  | -1.859567 | -1.596613 |
| 103 | 1 | 0 | 1.293856  | -1.494307 | -0.957524 |



|     |   |   |           |           |           |
|-----|---|---|-----------|-----------|-----------|
| 104 | 1 | 0 | 2.640593  | -0.984989 | -1.959728 |
| 105 | 6 | 0 | 0.592835  | -4.987707 | 1.171998  |
| 106 | 1 | 0 | -0.295911 | -4.764693 | 1.769162  |
| 107 | 1 | 0 | 0.226214  | -5.420388 | 0.234574  |
| 108 | 6 | 0 | 1.299266  | -3.652522 | 0.877613  |
| 109 | 1 | 0 | 0.582991  | -2.935187 | 0.474381  |
| 110 | 1 | 0 | 1.651769  | -3.227263 | 1.821823  |
| 111 | 6 | 0 | 6.377447  | -2.546038 | -2.799030 |
| 112 | 1 | 0 | 6.092525  | -3.377289 | -3.453613 |
| 113 | 1 | 0 | 7.008644  | -2.972709 | -2.011901 |
| 114 | 6 | 0 | 4.356788  | -2.040328 | 1.535733  |
| 115 | 1 | 0 | 3.982545  | -2.954714 | 2.004130  |
| 116 | 1 | 0 | 5.345999  | -2.269449 | 1.128548  |
| 117 | 6 | 0 | 1.450268  | -6.017154 | 1.917343  |
| 118 | 1 | 0 | 0.860207  | -6.902768 | 2.167349  |
| 119 | 1 | 0 | 1.838226  | -5.601506 | 2.852736  |
| 120 | 1 | 0 | 2.304180  | -6.354857 | 1.323129  |
| 121 | 6 | 0 | 7.180379  | -1.517697 | -3.599690 |
| 122 | 1 | 0 | 7.508436  | -0.689678 | -2.964363 |
| 123 | 1 | 0 | 6.582869  | -1.097980 | -4.414364 |
| 124 | 1 | 0 | 8.070881  | -1.973663 | -4.039570 |
| 125 | 6 | 0 | 4.504841  | -0.957911 | 2.616819  |
| 126 | 1 | 0 | 3.517811  | -0.726230 | 3.031218  |
| 127 | 1 | 0 | 4.871514  | -0.034051 | 2.157597  |
| 128 | 6 | 0 | 1.569179  | -2.673463 | -2.771805 |
| 129 | 1 | 0 | 2.382538  | -3.112842 | -3.357292 |
| 130 | 1 | 0 | 0.943007  | -3.497693 | -2.419362 |
| 131 | 6 | 0 | 0.728773  | -1.775671 | -3.694280 |
| 132 | 1 | 0 | -0.079456 | -1.317054 | -3.114918 |
| 133 | 6 | 0 | 5.449101  | -1.382765 | 3.744496  |
| 134 | 1 | 0 | 5.086454  | -2.285962 | 4.244477  |
| 135 | 1 | 0 | 5.537526  | -0.596699 | 4.498737  |

|     |   |   |           |           |           |
|-----|---|---|-----------|-----------|-----------|
| 136 | 1 | 0 | 6.452438  | -1.593023 | 3.361847  |
| 137 | 6 | 0 | 0.140272  | -2.540697 | -4.882508 |
| 138 | 1 | 0 | -0.517701 | -3.347917 | -4.547177 |
| 139 | 1 | 0 | 0.929285  | -2.986202 | -5.495981 |
| 140 | 1 | 0 | -0.445956 | -1.877424 | -5.523620 |
| 141 | 1 | 0 | 1.351630  | -0.952619 | -4.061844 |

-----

## 6. References:

[S1] Gaussian 09, Revision E.01; M. J. Frisch et al., Gaussian, Inc.: Wallingford CT, 2009.
